# Supplementary material for: The Strategy of Studying the Herb-Pair Inter-Reinforcement Mechanism Mapping on Chemical Space Between Sparganii Rhizoma and Curcumae Rhizoma
Source: Research Square preprint supplement (doi:10.21203/rs.3.rs-136208/v1), 2021-01-05
Supplement: Supplementary file 1 [file 9e048b6b655316b23396a6e2.xlsx]

## Sheet: Sheet1
Category	Term	Count	%	PValue	Genes	List Total	Pop Hits	Pop Total	Fold Enrichment	Bonferroni	Benjamini	FDR
GAD_DISEASE	Type 2 Diabetes| edema | rosiglitazone	71	71	2.01632e-32	CHRM2, ACHE, APP, CHRM1, PDE3B, PIK3CD, ADRA1D, PIK3CB, ADRA1B, NR3C1, ADRA1A, TNF, SLC6A4, NR3C2, ALDH2, CASP3, ADORA1, PDE4B, PDE4A, AKT1, SCN5A, PDE8A, CTSD, NCOA1, NCOA2, PDE4D, PDE4C, F2, PRKAB1, ADRA2A, AR, ADORA2A, PIK3CA, ADORA2B, CAT, PPARG, PGR, HDAC2, MAOB, ADH1C, MAOA, PDE1B, ADH1B, PDE1A, ADH1A, ITPR2, ADRB1, ITPR3, ADRB2, CYP3A4, CYP19A1, CYP17A1, PTGS1, PDE11A, RXRA, PDE6C, PDE6A, …	100	2198	12971	4.1899	6.79298e-29	6.79298e-29	6.3252e-29
GAD_DISEASE	several psychiatric disorders	28	28	5.74255e-22	GRIA2, ACHE, CHRM3, CHRM1, MAOB, MAOA, CHRNA7, ADRA1D, ADRB1, ADRB2, ADRA1B, NR3C1, ADRA1A, SLC6A3, PIK3CG, SLC6A4, NR3C2, GABRA2, GABRA1, GABRA6, NOS3, GABRA5, GABRA3, OPRK1, ESR1, ADRA2A, ADORA2A, ADORA2B	100	299	12971	12.1468	1.93467e-18	9.67333e-19	9.0072e-19
GAD_DISEASE	alcohol consumption	21	21	4.95874e-21	CHRM2, GABRA2, CHRM3, CHRM1, MAOB, ADH1C, GABRA6, MAOA, ADH1B, ADH1A, GABRA3, OPRK1, ADRB2, ADRA2C, NR3C1, ADRA1A, SLC6A3, ADRA2A, SLC6A4, ALDH2, CAT	100	130	12971	20.9532	1.6706e-17	5.56867e-18	5.18519e-18
GAD_DISEASE	Hypercholesterolemia|LDLC levels	22	22	7.84185e-19	CHRM2, GABRA2, ACHE, CHRM3, CHRM1, NOS3, CHRNA7, PIK3CD, ADRB1, PIK3CB, ADRB2, F2, CYP3A4, NR3C1, SLC6A3, PIK3CG, ADRA2A, SLC6A4, RXRA, PIK3CA, ADORA1, PPARG	100	193	12971	14.7856	2.64192e-15	6.6048e-16	6.14997e-16
GAD_DISEASE	attention deficit disorder conduct disorder oppositional defiant disorder	15	15	6.63443e-18	GABRA1, GABRA6, MAOA, NOS3, GABRA5, GABRA3, ADRB1, ADRA2C, ESR1, CYP19A1, SLC6A3, ADRA2A, SLC6A4, AR, ADORA2A	100	58	12971	33.5457	2.23514e-14	4.47028e-15	4.16244e-15
GAD_DISEASE	autism	26	26	1.1254e-17	MAOB, MAOA, CHRNA7, ABAT, ADRB2, ADRA1B, TNF, CYP19A1, SLC6A3, PIK3CG, SLC6A4, CYP17A1, CASP3, GABRA2, GABRA1, KCND2, GABRA6, SRD5A1, GABRA5, GABRA3, OPRK1, ESR1, ADRA2A, AR, ADORA2A, BCL2	100	357	12971	9.44667	3.79148e-14	6.31913e-15	5.88397e-15
GAD_DISEASE	Schizophrenia	35	35	1.51138e-17	CHRM2, GRIA2, CHRM1, MAOB, MAOA, CHRNA7, ABAT, PIK3CB, NR3C1, CYP3A4, ADRA1A, TNF, SLC6A3, SLC6A4, NR3C2, PTGS1, ADORA1, PDE4B, AKT1, GABRA1, GABRA6, NOS3, SRD5A1, GABRA5, PDE4D, ADRA2C, ESR1, ADRA2A, AR, ADORA2A, PIK3CA, DLG4, ATM, PPARG, PDE7B	100	785	12971	5.78325	5.09185e-14	7.27407e-15	6.77316e-15
GAD_DISEASE	BMI- Edema rosiglitazone or pioglitazone	17	17	8.96428e-17	CHRM3, PIK3CD, ADRB1, PIK3CB, ADRB2, CYP3A4, NR3C1, ADRA1A, TNF, PRKAB1, PIK3CG, ADRA2A, ADORA2A, PIK3CA, ADORA2B, AKT1, PPARG	100	107	12971	20.6081	3.74034e-13	3.77508e-14	3.51512e-14
GAD_DISEASE	Bipolar Disorder	25	25	2.91078e-15	CHRM2, GRIA2, CHRM3, CHRM1, MAOB, MAOA, CHRNA7, ITPR2, ADRA1B, NR3C1, TNF, SLC6A3, SLC6A4, ADORA1, AKT1, PRSS3, GABRA2, GABRA1, GABRA6, NOS3, GABRA5, GABRA3, ESR1, PDE10A, PKIA	100	407	12971	7.96744	9.72489e-12	1.0896e-12	1.01457e-12
GAD_DISEASE	Bulimia	18	18	3.3181e-14	GABRA2, GRIA2, GABRA1, GABRA6, MAOA, GABRA5, GABRA3, OPRK1, ADRB1, ADRB2, ADRA1B, ESR1, SLC6A3, ADRA2A, SLC6A4, ADORA2A, ADORA1, PPARG	100	183	12971	12.7584	1.11836e-10	1.11787e-11	1.04089e-11
GAD_DISEASE	Alcoholism	26	26	4.74085e-14	CHRM2, CHRM1, MAOB, ADH1C, MAOA, ADH1B, ADH1A, ADRA1D, ADRB2, TNF, SLC6A3, SLC6A4, ALDH2, PDE4B, GABRA2, GABRA1, KCND2, GABRA6, PDE4D, OPRK1, ESR1, AR, PDE10A, DLG4, PDE5A, PDE7B	100	509	12971	6.62566	1.59713e-10	1.45199e-11	1.35201e-11
GAD_DISEASE	null	33	33	1.57026e-13	CHRM2, ACHE, ADH1C, MAOA, ADH1B, ADH1A, ADRB1, ADRB2, NR3C1, CYP3A4, ADRA1A, TNF, CYP19A1, SLC6A3, SLC6A4, NR3C2, PTGS1, CYP17A1, PDE11A, ALDH2, AKT1, SCN5A, NOS3, ADRA2C, F2, ESR1, ADRA2A, AR, PIK3CA, CAT, BCL2, PPARG, PGR	100	936	12971	4.57311	5.28884e-10	4.4085e-11	4.10492e-11
GAD_DISEASE	normal variation	20	20	2.9503e-13	MAOB, ADH1C, MAOA, NOS3, ADH1B, ADRB1, ADRB2, F2, CYP3A4, NR3C1, ESR1, TNF, SLC6A3, SLC6A4, PTGS1, NR3C2, AR, RXRA, CAT, PPARG	100	281	12971	9.23203	9.93809e-10	7.64581e-11	7.11929e-11
GAD_DISEASE	alcohol abuse	11	11	6.56205e-13	GABRA1, ALDH2, ADH1C, GABRA6, MAOA, ADH1B, CAT, OPRK1, TNF, SLC6A3, SLC6A4	100	43	12971	33.1816	2.21092e-09	1.57911e-10	1.47037e-10
GAD_DISEASE	Colorectal Cancer	23	23	7.47253e-13	ADH1C, NOS3, ADH1B, ADH1A, ADRB2, F2, CYP3A4, NR3C1, ESR1, CYP19A1, TNF, SLC6A4, PTGS1, CYP17A1, RXRA, PIK3CA, ALDH2, CASP3, CAT, AKT1, ATM, PGR, PPARG	100	426	12971	7.00312	2.51762e-09	1.67833e-10	1.56275e-10
GAD_DISEASE	hypertension	28	28	1.4756e-12	CHRM3, ADH1C, ADH1B, ADRB1, ADRB2, ADRA1B, NR3C1, CYP3A4, ADRA1A, TNF, CYP19A1, SLC6A4, NR3C2, CYP17A1, ALDH2, ADORA1, PTPN1, KCND2, NOS3, ADRA2C, F2, ESR1, ADRA2A, AR, ADORA2A, CAT, ATM, PPARG	100	705	12971	5.1516	4.97129e-09	3.10707e-10	2.89311e-10
GAD_DISEASE	Weight Gain	14	14	2.23591e-11	ACHE, GRIA2, CHRM3, CHRM1, MAOB, MAOA, CHRNA7, ADRB2, NR3C1, TNF, SLC6A3, ADRA2A, SLC6A4, PPARG	100	133	12971	13.6537	7.53279e-08	4.43105e-09	4.12591e-09
GAD_DISEASE	prostate cancer	23	23	2.62464e-11	NCOA1, RYR1, NCOA2, MAOA, NOS3, SRD5A1, PIK3CD, CYP3A4, NR3C1, ESR1, CYP19A1, TNF, CYP17A1, AR, RXRA, PIK3CA, ALDH2, CAT, BCL2, AKT1, ATM, PGR, PPARG	100	510	12971	5.84967	8.84239e-08	4.91244e-09	4.57416e-09
GAD_DISEASE	epithelial ovarian cancer	15	15	3.72478e-11	NCOA1, HDAC2, SRD5A1, F2, CYP3A4, ESR1, CYP19A1, TNF, PTGS1, CYP17A1, AR, PIK3CA, ATM, PGR, PPARG	100	170	12971	11.445	1.25488e-07	6.60462e-09	6.1498e-09
GAD_DISEASE	bronchodilator response	13	13	4.17735e-11	NCOA1, CHRM2, NCOA2, CHRM3, HDAC2, NOS3, ITPR1, ITPR2, ITPR3, ADRB2, NR3C1, TNF, PPARG	100	111	12971	15.1913	1.40735e-07	7.03674e-09	6.55217e-09
GAD_DISEASE	alcohol	11	11	9.88707e-11	GABRA2, AR, PRSS1, ALDH2, ADH1C, MAOA, ADH1B, ADH1A, PPARG, SLC6A3, SLC6A4	100	69	12971	20.6784	3.33095e-07	1.58617e-08	1.47694e-08
GAD_DISEASE	atherosclerosis	19	19	1.6143e-10	PTPN1, ADH1C, NOS3, PDE4D, ADRB2, F2, NR3C1, ESR1, TNF, PRKAB1, PTGS1, AR, TPO, ADORA2A, ALDH2, ADORA2B, CAT, AKT1, PPARG	100	355	12971	6.94223	5.43857e-07	2.47208e-08	2.30184e-08
GAD_DISEASE	Depressive Disorder, Major	12	12	2.34626e-10	AR, PDE11A, MAOA, CHRNA7, GABRA3, ADRB1, PPARG, ADRA2C, NR3C1, ESR1, PDE9A, SLC6A4	100	100	12971	15.5652	7.90456e-07	3.43677e-08	3.2001e-08
GAD_DISEASE	breast cancer	22	22	2.51804e-10	NCOA1, NCOA2, HDAC2, NOS3, SRD5A1, ADH1B, ADH1A, ADRB2, F2, CYP3A4, ESR1, CYP19A1, TNF, PTGS1, CYP17A1, AR, PIK3CA, ALDH2, CAT, BCL2, ATM, PGR	100	518	12971	5.50892	8.48327e-07	3.5347e-08	3.29129e-08
GAD_DISEASE	alcohol dependence	9	9	2.7799e-10	GABRA2, GABRA1, ALDH2, ADH1C, GABRA6, ADH1B, ADH1A, ESR1, SLC6A4	100	37	12971	31.5511	9.36548e-07	3.74619e-08	3.48822e-08
GAD_DISEASE	pharmacogenetic studies	12	12	4.91298e-10	NOS3, BCL2, ADRB1, PPARG, ADRB2, F2, CYP3A4, ESR1, CYP19A1, TNF, SLC6A3, CYP17A1	100	107	12971	14.5469	1.65518e-06	6.21365e-08	5.78576e-08
GAD_DISEASE	Alzheimer's Disease	18	18	4.97977e-10	ACHE, APP, CHRM1, MAOA, NOS3, CHRNA7, ADRB1, ESR1, CYP19A1, TNF, ADRA2A, SLC6A4, CYP17A1, AR, ALDH2, CAT, PPARG, CTSD	100	333	12971	7.01135	1.67768e-06	6.21365e-08	5.78576e-08
GAD_DISEASE	Breast Cancer	23	23	5.55045e-10	ADH1C, NOS3, SRD5A1, ADH1B, PIK3CB, ADRB2, F2, CYP3A4, ESR1, CYP19A1, TNF, SLC6A3, PIK3CG, SLC6A4, CYP17A1, AR, PIK3CA, ALDH2, CAT, BCL2, ATM, PGR, PPARG	100	598	12971	4.98885	1.86994e-06	6.67838e-08	6.21849e-08
GAD_DISEASE	Diseases in Twins	6	6	1.28644e-09	GABRA2, GABRA6, MAOA, GABRA3, SLC6A3, SLC6A4	100	8	12971	97.2825	4.334e-06	1.47752e-07	1.37578e-07
GAD_DISEASE	Alzheimer's disease	28	28	1.31569e-09	APP, ACHE, MAOA, CHRNA7, ADH1A, ADRB1, ADRB2, ADRA1A, TNF, CYP19A1, SLC6A3, SLC6A4, PTGS1, CYP17A1, RXRA, ALDH2, AKT1, PDE6C, CTSD, PTPN1, NOS3, F2, ESR1, PRKAB1, ADRA2A, AR, PIK3CA, PPARG	100	950	12971	3.82303	4.43256e-06	1.47752e-07	1.37578e-07
GAD_DISEASE	Migraine Disorders	11	11	1.4582e-09	MAOA, NOS3, PGR, ADRB2, F2, CYP3A4, ESR1, CYP19A1, TNF, SLC6A3, SLC6A4	100	90	12971	15.8534	4.91265e-06	1.58473e-07	1.4756e-07
GAD_DISEASE	Cardiovascular Diseases	14	14	1.82788e-09	ADH1C, NOS3, ADRB2, F2, NR3C1, ESR1, CYP19A1, TNF, SLC6A4, PTGS1, ALDH2, CAT, PPARG, SCN5A	100	189	12971	9.60815	6.1581e-06	1.92441e-07	1.79189e-07
GAD_DISEASE	chronic obstructive pulmonary disease	19	19	1.91445e-09	ADH1C, NOS3, ADRB1, ADRB2, ESR1, CYP19A1, TNF, SLC6A3, SLC6A4, PTGS1, CYP17A1, RXRA, ALDH2, CASP3, CAT, AKT1, ATM, PGR, PPARG	100	414	12971	5.95287	6.44978e-06	1.95448e-07	1.81989e-07
GAD_DISEASE	Depression	13	13	2.24784e-09	CHRM2, MAOA, PDE1A, ADRB2, NR3C1, TNF, SLC6A3, ADRA2A, SLC6A4, AR, PDE11A, PPARG, PDE9A	100	156	12971	10.8092	7.57294e-06	2.22734e-07	2.07396e-07
GAD_DISEASE	Obesity	18	18	2.38542e-09	PTPN1, GABRA6, MAOA, NOS3, ADRB1, ITPR3, ADRB2, F2, NR3C1, ESR1, CYP19A1, TNF, SLC6A3, ADRA2A, SLC6A4, AR, PDE10A, PPARG	100	369	12971	6.32732	8.03645e-06	2.29614e-07	2.13802e-07
GAD_DISEASE	suicide	9	9	2.53631e-09	ALDH2, MAOA, ADH1B, NOS3, GABRA3, TNF, SLC6A3, ADRA2A, SLC6A4	100	48	12971	24.3206	8.5448e-06	2.37356e-07	2.21011e-07
GAD_DISEASE	major depressive disorder	9	9	3.01229e-09	MAOA, CHRNA7, PDE4B, AKT1, NR3C1, ESR1, ADRA1A, SLC6A3, SLC6A4	100	49	12971	23.8243	1.01484e-05	2.74282e-07	2.55394e-07
GAD_DISEASE	Parkinson's Disease	14	14	5.22045e-09	MAOB, ADH1C, MAOA, NOS3, ADH1A, ESR1, ADRA1A, TNF, SLC6A3, ADRA2A, SLC6A4, CYP17A1, ALDH2, CTSD	100	206	12971	8.81524	1.75875e-05	4.62834e-07	4.30962e-07
GAD_DISEASE	Lymphoma, Non-Hodgkin	15	15	5.70623e-09	PTPN1, NOS3, SRD5A1, ADRB2, NR3C1, ESR1, CYP19A1, TNF, SLC6A3, PTGS1, CYP17A1, AR, CASP3, BCL2, PGR	100	249	12971	7.81386	1.92241e-05	4.92931e-07	4.58986e-07
GAD_DISEASE	Obesity|POF - Premature ovarian failure|POLYCYSTIC OVARIAN SYNDROME|Polycystic Ovary Syndrome|Primary Ovarian Insufficiency|Puberty, Delayed|Puberty, Precocious|Thrombophilia|Tobacco Use Disorder	15	15	6.00736e-09	MAOB, MAOA, NOS3, CHRNA7, OPRK1, ADRB2, F2, CYP3A4, NR3C1, ESR1, SLC6A3, SLC6A4, CYP17A1, AR, AKT1	100	250	12971	7.7826	2.02386e-05	5.0597e-07	4.71127e-07
GAD_DISEASE	Obesity, Morbid	8	8	8.47772e-09	PTPN1, PPARG, ADRB2, NR3C1, ESR1, CYP19A1, TNF, ADRA2A	100	36	12971	28.8244	2.8561e-05	6.9662e-07	6.48649e-07
GAD_DISEASE	personality	9	9	1.04984e-08	AR, MAOB, ALDH2, MAOA, CHRNA7, ADH1A, SLC6A3, CYP17A1, SLC6A4	100	57	12971	20.4805	3.53685e-05	8.42122e-07	7.84131e-07
GAD_DISEASE	migraine	8	8	1.26583e-08	AR, MAOA, NOS3, GABRA5, PGR, ESR1, TNF, SLC6A4	100	38	12971	27.3074	4.2645e-05	9.91765e-07	9.23469e-07
GAD_DISEASE	Bladder Cancer	20	20	1.47995e-08	ADH1C, MAOA, NOS3, CYP3A4, ESR1, CYP19A1, TNF, SLC6A3, PTGS1, CYP17A1, AR, POLA2, RXRA, ALDH2, CASP3, CAT, AKT1, ATM, PGR, PPARG	100	529	12971	4.90397	4.98584e-05	1.13317e-06	1.05514e-06
GAD_DISEASE	tardive dyskinesia	7	7	3.45177e-08	MAOB, MAOA, NOS3, CYP3A4, SLC6A3, CYP17A1, SLC6A4	100	26	12971	34.9219	0.000116283	2.58422e-06	2.40627e-06
GAD_DISEASE	Infection|Inflammation|Premature Birth	11	11	3.63007e-08	ADH1C, ADH1B, NOS3, PGR, ADRB2, F2, NR3C1, CYP19A1, TNF, SLC6A4, PTGS1	100	125	12971	11.4145	0.00012229	2.65863e-06	2.47555e-06
GAD_DISEASE	Coronary Disease|Coronary heart disease	9	9	4.38413e-08	ALDH2, ADH1C, ADH1B, NOS3, PPARG, F2, ESR1, TNF, SLC6A4	100	68	12971	17.1675	0.00014769	3.13261e-06	2.91688e-06
GAD_DISEASE	Connective Tissue Diseases|Fetal Diseases|Inflammation|Musculoskeletal Diseases|Pregnancy Complications, Hematologic|Premature Birth|Skin Diseases	11	11	4.55618e-08	ADH1C, ADH1B, NOS3, PGR, ADRB2, F2, NR3C1, CYP19A1, TNF, SLC6A4, PTGS1	100	128	12971	11.147	0.000153486	3.13261e-06	2.91688e-06
GAD_DISEASE	Inflammation|Premature Birth	11	11	4.55618e-08	ADH1C, ADH1B, NOS3, PGR, ADRB2, F2, NR3C1, CYP19A1, TNF, SLC6A4, PTGS1	100	128	12971	11.147	0.000153486	3.13261e-06	2.91688e-06
GAD_DISEASE	lung cancer	19	19	5.84228e-08	ADH1C, MAOA, NOS3, CHRNA7, CYP3A4, ESR1, CYP19A1, TNF, SLC6A3, PTGS1, CYP17A1, RXRA, ALDH2, CASP3, BCL2, AKT1, ATM, PGR, PPARG	100	516	12971	4.77614	0.000196807	3.93653e-06	3.66545e-06
GAD_DISEASE	esophageal adenocarcinoma	16	16	6.21219e-08	ADH1C, NOS3, CYP3A4, ESR1, CYP19A1, TNF, PIK3CG, PTGS1, CYP17A1, PIK3CA, CASP3, BCL2, AKT1, ATM, PGR, PPARG	100	351	12971	5.91271	0.000209267	4.1037e-06	3.8211e-06
GAD_DISEASE	Endometriosis	10	10	6.51607e-08	AR, PIK3CA, NOS3, AKT1, PGR, PPARG, ESR1, CYP19A1, TNF, CYP17A1	100	100	12971	12.971	0.000219502	4.22166e-06	3.93095e-06
GAD_DISEASE	Acute Coronary Syndrome	8	8	6.93965e-08	ADH1C, ADH1B, NOS3, ADRB1, PPARG, ADRB2, CYP3A4, ADRA2A	100	48	12971	21.6183	0.000233769	4.41126e-06	4.10749e-06
GAD_DISEASE	alcohol abuse; smoking behavior	6	6	9.55971e-08	ALDH2, ADH1C, NOS3, ESR1, CYP17A1, SLC6A4	100	16	12971	48.6412	0.000322015	5.9642e-06	5.55348e-06
GAD_DISEASE	Alcohol-Related Disorders	5	5	1.09805e-07	ALDH2, MAOA, ADH1B, OPRK1, SLC6A4	100	7	12971	92.65	0.000369865	6.72605e-06	6.26288e-06
GAD_DISEASE	blood pressure, arterial	8	8	2.07976e-07	NCOA1, NOS3, ADRB1, ADRB2, ADRA2C, ESR1, CYP19A1, ADRA2A	100	56	12971	18.53	0.000700425	1.2512e-05	1.16504e-05
GAD_DISEASE	Abortion, Habitual|Infertility, Female	6	6	3.31202e-07	AR, PGR, NR3C1, ESR1, CYP19A1, CYP17A1	100	20	12971	38.913	0.0011152	1.95758e-05	1.82278e-05
GAD_DISEASE	Low Tension Glaucoma	5	5	3.90681e-07	ADRB1, ADRB2, ADRA2C, ADRA1A, ADRA2A	100	9	12971	72.0611	0.00131534	2.26932e-05	2.11304e-05
GAD_DISEASE	Lung Cancer	19	19	4.63898e-07	ADH1C, MAOA, NOS3, CYP3A4, ESR1, CYP19A1, TNF, SLC6A3, PTGS1, CYP17A1, RXRA, PIK3CA, ALDH2, CASP3, CAT, AKT1, ATM, PGR, PPARG	100	593	12971	4.15597	0.00156165	2.64894e-05	2.46652e-05
GAD_DISEASE	prostatic hyperplasia	6	6	5.55792e-07	AR, SRD5A1, CYP3A4, CYP19A1, ADRA1A, CYP17A1	100	22	12971	35.3755	0.00187071	3.09608e-05	2.88287e-05
GAD_DISEASE	Type 2 diabetes	15	15	5.60584e-07	PTPN1, NOS3, ADH1B, ADRB2, F2, CYP3A4, ADRA2C, ESR1, TNF, ADRA2A, PIK3CA, ALDH2, CAT, AKT1, PPARG	100	360	12971	5.40458	0.00188683	3.09608e-05	2.88287e-05
GAD_DISEASE	polycystic ovary syndrome	8	8	5.90344e-07	AR, NOS3, PPARG, ESR1, CYP19A1, TNF, PDE8A, CYP17A1	100	65	12971	15.9643	0.00198689	3.20786e-05	2.98695e-05
GAD_DISEASE	Substance-Related Disorders	6	6	7.05896e-07	AR, MAOA, OPRK1, ESR1, SLC6A3, SLC6A4	100	23	12971	33.8374	0.00237534	3.77486e-05	3.51491e-05
GAD_DISEASE	Osteoporosis, Postmenopausal	7	7	8.232e-07	AR, NOS3, PPARG, NR3C1, ESR1, CYP19A1, TNF	100	43	12971	21.1156	0.00276952	4.26671e-05	3.97289e-05
GAD_DISEASE	smoking behavior	7	7	8.232e-07	MAOB, MAOA, CHRNA7, NR3C1, TNF, SLC6A3, SLC6A4	100	43	12971	21.1156	0.00276952	4.26671e-05	3.97289e-05
GAD_DISEASE	diabetes, type 2	16	16	1.09724e-06	PTPN1, ADH1C, NOS3, PDE3B, PIK3CB, ADRB2, F2, NR3C1, ESR1, TNF, SLC6A4, AR, ALDH2, CAT, AKT1, PPARG	100	439	12971	4.72747	0.00368976	5.53709e-05	5.15579e-05
GAD_DISEASE	Albuminuria|Inflammation|Kidney Diseases	6	6	1.10117e-06	NOS3, CAT, PPARG, ADRB2, F2, TNF	100	25	12971	31.1304	0.00370298	5.53709e-05	5.15579e-05
GAD_DISEASE	Sudden Infant Death	6	6	1.35514e-06	MAOA, ADRB1, SCN5A, TNF, SLC6A3, SLC6A4	100	26	12971	29.9331	0.00455506	6.71391e-05	6.25157e-05
GAD_DISEASE	ADHD | attention-deficit hyperactivity disorder	9	9	1.41035e-06	MAOA, CHRNA7, ADRB1, ADRB2, ADRA2C, ADRA1A, SLC6A3, ADRA2A, SLC6A4	100	106	12971	11.0131	0.00474021	6.8862e-05	6.412e-05
GAD_DISEASE	ovarian cancer	10	10	1.5658e-06	AR, PIK3CA, ATM, PGR, CYP3A4, ESR1, CYP19A1, CTSD, SLC6A3, CYP17A1	100	145	12971	8.94552	0.0052613	7.53598e-05	7.01703e-05
GAD_DISEASE	Leiomyoma|Uterine Neoplasms	6	6	1.6531e-06	AR, PGR, ESR1, CYP19A1, TNF, CYP17A1	100	27	12971	28.8244	0.00555382	7.84408e-05	7.30391e-05
GAD_DISEASE	blood pressure; heart rate	4	4	1.71575e-06	ADRB1, ADRB2, ADRA1B, ADRA2A	100	4	12971	129.71	0.00576371	8.0283e-05	7.47545e-05
GAD_DISEASE	Asthma	16	16	1.96275e-06	CHRM2, CHRM3, CHRM1, NOS3, PDE4D, ADRB2, ADRA1B, NR3C1, ESR1, TNF, PTGS1, ALDH2, CAT, ADORA1, PPARG, PDE9A	100	460	12971	4.51165	0.00659068	9.0582e-05	8.43443e-05
GAD_DISEASE	Ache, Low Back|Acute Disease|Low Back Pain|Pain|Sciatica	5	5	2.1655e-06	GABRA2, CHRM1, ADRA2C, ADRA1A, ADRA2A	100	13	12971	49.8885	0.00726903	9.72742e-05	9.05756e-05
GAD_DISEASE	anxiety disorder	5	5	2.1655e-06	ACHE, ADORA2A, MAOA, ADORA1, SLC6A4	100	13	12971	49.8885	0.00726903	9.72742e-05	9.05756e-05
GAD_DISEASE	Myocardial Infarction	17	17	2.72101e-06	CHRM2, ADH1C, NOS3, ADRA1D, ADRB1, ADRB2, F2, ESR1, TNF, SLC6A4, PTGS1, TPO, PDE10A, ALDH2, PKIA, PPARG, PDE8A	100	536	12971	4.11394	0.00912522	0.00011924	0.000111029
GAD_DISEASE	atherosclerosis, coronary	10	10	2.72529e-06	ADH1B, NOS3, PPARG, F2, NR3C1, ESR1, CYP19A1, TNF, CYP17A1, PTGS1	100	155	12971	8.36839	0.00913949	0.00011924	0.000111029
GAD_DISEASE	plasma HDL cholesterol (HDL-C) levels	12	12	2.97429e-06	NCOA1, NCOA2, PTPN1, RXRA, PIK3CA, NOS3, AKT1, PPARG, NR3C1, PRKACA, ESR1, TNF	100	249	12971	6.25108	0.00997035	0.000128466	0.00011962
GAD_DISEASE	Chronic renal failure|Kidney Failure, Chronic	22	22	3.60201e-06	PTPN1, NOS3, SRD5A1, ADRB2, F2, CYP3A4, NR3C1, ESR1, CYP19A1, TNF, PTGS1, CYP17A1, POLA2, RXRA, ALDH2, CASP3, CAT, BCL2, PDE5A, ATM, PGR, PPARG	100	905	12971	3.15317	0.0120619	0.00015361	0.000143032
GAD_DISEASE	cognitive function	6	6	4.00081e-06	APP, MAOA, CHRNA7, ESR1, SLC6A3, SLC6A4	100	32	12971	24.3206	0.0133883	0.000168484	0.000156882
GAD_DISEASE	post-traumatic stress disorder	4	4	4.26558e-06	MAOB, NR3C1, SLC6A3, SLC6A4	100	5	12971	103.768	0.014268	0.000175253	0.000163184
GAD_DISEASE	idiopathic orthostatic intolerance	4	4	4.26558e-06	ADRB1, ADRB2, ADRA2C, ADRA2A	100	5	12971	103.768	0.014268	0.000175253	0.000163184
GAD_DISEASE	pregnancy loss, recurrent	7	7	4.49575e-06	NOS3, PGR, F2, ESR1, CYP19A1, TNF, CYP17A1	100	57	12971	15.9293	0.0150321	0.000182484	0.000169918
GAD_DISEASE	Sleep Apnea, Obstructive	7	7	4.98377e-06	NOS3, ADRB1, ADRB2, ADRA1B, TNF, ADRA2A, SLC6A4	100	58	12971	15.6547	0.0166502	0.000199885	0.00018612
GAD_DISEASE	chronic fatigue syndrome	5	5	5.416e-06	MAOB, MAOA, NR3C1, TNF, SLC6A4	100	16	12971	40.5344	0.0180811	0.000208726	0.000194352
GAD_DISEASE	endurance performance	5	5	5.416e-06	MAOA, NOS3, ADRB1, ADRB2, SLC6A4	100	16	12971	40.5344	0.0180811	0.000208726	0.000194352
GAD_DISEASE	financial and psychological risk attitudes	5	5	5.416e-06	MAOB, MAOA, ESR1, SLC6A3, SLC6A4	100	16	12971	40.5344	0.0180811	0.000208726	0.000194352
GAD_DISEASE	Endometrial Neoplasms	7	7	5.51397e-06	AR, PIK3CA, AKT1, PGR, ESR1, CYP19A1, CYP17A1	100	59	12971	15.3893	0.0184051	0.000208726	0.000194352
GAD_DISEASE	POLYCYSTIC OVARIAN SYNDROME|Polycystic Ovary Syndrome	7	7	5.51397e-06	AR, SRD5A1, PGR, PPARG, CYP19A1, TNF, CYP17A1	100	59	12971	15.3893	0.0184051	0.000208726	0.000194352
GAD_DISEASE	patent ductus arteriosus	9	9	6.53765e-06	ALDH2, PGR, ADRB2, F2, NR3C1, ESR1, TNF, CYP17A1, PTGS1	100	130	12971	8.97992	0.0217846	0.000244726	0.000227874
GAD_DISEASE	heroin abuse	5	5	7.04104e-06	GABRA1, GABRA6, OPRK1, SLC6A3, SLC6A4	100	17	12971	38.15	0.0234422	0.000260673	0.000242723
GAD_DISEASE	Hepatopulmonary Syndrome|Liver Cirrhosis	8	8	7.2486e-06	NOS3, AKT1, PPARG, PDE5A, ESR1, CYP19A1, TNF, SLC6A4	100	94	12971	11.0391	0.0241249	0.000265441	0.000247162
GAD_DISEASE	breast cancer|prostate cancer	7	7	7.38561e-06	AR, SRD5A1, PGR, CYP3A4, ESR1, CYP19A1, CYP17A1	100	62	12971	14.6447	0.0245752	0.00026755	0.000249125
GAD_DISEASE	Bone Density	11	11	7.55652e-06	AR, ALDH2, SRD5A1, ADH1B, NOS3, PDE4D, CAT, ESR1, CYP19A1, TNF, CYP17A1	100	223	12971	6.39825	0.0251367	0.000270829	0.000252179
GAD_DISEASE	kidney failure, chronic	10	10	8.07745e-06	PTPN1, ALDH2, NOS3, PDE4D, ADRB1, PPARG, ADRB2, NR3C1, ESR1, TNF	100	177	12971	7.32825	0.0268461	0.000286452	0.000266726
GAD_DISEASE	Apoplexy|Stroke	6	6	8.4025e-06	NOS3, PDE4D, PPARG, ADRB2, TNF, SLC6A4	100	37	12971	21.0341	0.0279112	0.00029466	0.000274368
GAD_DISEASE	Bone necrosis|Osteonecrosis	4	4	8.48382e-06	NCOA2, F2, CYP3A4, NR3C1	100	6	12971	86.4733	0.0281775	0.00029466	0.000274368
GAD_DISEASE	mood disorder	5	5	8.99984e-06	GABRA1, MAOB, ADORA2A, MAOA, SLC6A4	100	18	12971	36.0306	0.0298655	0.000309392	0.000288087
GAD_DISEASE	smoking	8	8	1.24439e-05	PDE1C, MAOA, NOS3, NR3C1, ESR1, SLC6A3, ADRA2A, SLC6A4	100	102	12971	10.1733	0.0410571	0.000413747	0.000385255
GAD_DISEASE	ADHD	6	6	1.24563e-05	MAOB, MAOA, CHRNA7, SLC6A3, ADRA2A, SLC6A4	100	40	12971	19.4565	0.0410973	0.000413747	0.000385255
GAD_DISEASE	Peripheral Vascular Diseases	6	6	1.24563e-05	SRD5A1, NOS3, PPARG, F2, ESR1, CYP19A1	100	40	12971	19.4565	0.0410973	0.000413747	0.000385255
GAD_DISEASE	Parkinson's disease	9	9	1.25266e-05	ADORA2A, MAOA, NOS3, AKT1, ESR1, CYP19A1, TNF, SLC6A3, SLC6A4	100	142	12971	8.22106	0.0413244	0.000413747	0.000385255
GAD_DISEASE	Bone Mineral Density	14	14	1.39898e-05	NCOA1, NCOA2, CYP3A4, NR3C1, ESR1, CYP19A1, TNF, CYP17A1, AR, RXRA, CASP3, BCL2, AKT1, PPARG	100	411	12971	4.41835	0.0460386	0.000456791	0.000425335
GAD_DISEASE	attention deficit hyperactivity disorder	6	6	1.4101e-05	MAOB, MAOA, ADRB2, SLC6A3, ADRA2A, SLC6A4	100	41	12971	18.982	0.0463958	0.000456791	0.000425335
GAD_DISEASE	Syncope, Vasovagal|Vasovagal syncope	4	4	1.47643e-05	ADRB1, ADRB2, ADRA1A, SLC6A4	100	7	12971	74.12	0.0485246	0.000469255	0.000436941
GAD_DISEASE	manic-depressive illness	4	4	1.47643e-05	MAOA, GABRA3, SLC6A3, SLC6A4	100	7	12971	74.12	0.0485246	0.000469255	0.000436941
GAD_DISEASE	weight loss	5	5	1.72958e-05	AR, NOS3, PPARG, ADRA2A, SLC6A4	100	21	12971	30.8833	0.0566048	0.000544574	0.000507073
GAD_DISEASE	mood disorders	6	6	2.00682e-05	GABRA1, MAOA, NR3C1, ESR1, TNF, SLC6A4	100	44	12971	17.6877	0.0653755	0.000626016	0.000582907
GAD_DISEASE	Obesity|Overweight	5	5	2.10158e-05	MAOA, PPARG, ADRB2, TNF, SLC6A4	100	22	12971	29.4795	0.0683545	0.000649561	0.00060483
GAD_DISEASE	endometrial cancer	6	6	2.24409e-05	AR, ATM, PGR, ESR1, CYP19A1, CYP17A1	100	45	12971	17.2947	0.072817	0.000687304	0.000639974
GAD_DISEASE	cirrhosis, alcoholic; alcoholism	4	4	2.34919e-05	GABRA1, GABRA6, SLC6A3, SLC6A4	100	8	12971	64.855	0.0760943	0.000713012	0.000663912
GAD_DISEASE	Irritable Bowel Syndrome	5	5	2.52915e-05	SCN5A, ADRA2C, TNF, ADRA2A, SLC6A4	100	23	12971	28.1978	0.081679	0.000754046	0.00070212
GAD_DISEASE	Migraine with Aura	5	5	2.52915e-05	NOS3, GABRA5, ESR1, SLC6A3, SLC6A4	100	23	12971	28.1978	0.081679	0.000754046	0.00070212
GAD_DISEASE	pregnancy loss	7	7	2.5978e-05	ACHE, AR, PGR, F2, ESR1, CYP19A1, TNF	100	77	12971	11.7918	0.0838004	0.000767718	0.000714851
GAD_DISEASE	Coronary Artery Disease	15	15	3.10892e-05	ADH1C, NOS3, ADRB1, ADRB2, F2, CYP3A4, NR3C1, ESR1, TNF, ADRA2A, PTGS1, AR, RXRA, ALDH2, PPARG	100	510	12971	3.815	0.0994425	0.000910779	0.00084806
GAD_DISEASE	Asthma|	8	8	3.21693e-05	CHRM3, CHRM1, NOS3, PDE4D, CAT, ADRB2, CYP3A4, TNF	100	118	12971	8.7939	0.102713	0.000930785	0.000866689
GAD_DISEASE	cognitive ability	7	7	3.23247e-05	CHRM2, PPARG, ADRA2C, CTSD, SLC6A3, ADRA2A, SLC6A4	100	80	12971	11.3496	0.103183	0.000930785	0.000866689
GAD_DISEASE	cirrhosis; pancreatitis	4	4	3.50426e-05	ALDH2, ADH1C, ADH1B, TNF	100	9	12971	57.6489	0.111358	0.00100049	0.000931598
GAD_DISEASE	myocardial infarct	8	8	3.78158e-05	ALDH2, NOS3, ADRB1, PPARG, ADRB2, SCN5A, F2, SLC6A4	100	121	12971	8.57587	0.119622	0.0010706	0.000996875
GAD_DISEASE	Diabetes mellitus|Diabetes mellitus type II|Diabetes Mellitus, Type 2	6	6	4.16136e-05	PTPN1, NOS3, PPARG, CYP3A4, TNF, PRKAB1	100	51	12971	15.26	0.130815	0.00116503	0.0010848
GAD_DISEASE	personality traits	5	5	4.19563e-05	CHRM2, MAOA, ADRA2C, SLC6A3, SLC6A4	100	26	12971	24.9442	0.131818	0.00116503	0.0010848
GAD_DISEASE	Osteoporosis	9	9	4.21887e-05	AR, CA2, NOS3, PGR, PPARG, CYP3A4, ESR1, CYP19A1, TNF	100	168	12971	6.94875	0.132497	0.00116503	0.0010848
GAD_DISEASE	Cardiomyopathy, Dilated|	4	4	4.97834e-05	CHRM2, ADRB1, ADRB2, ADRA2C	100	10	12971	51.884	0.154413	0.00134176	0.00124936
GAD_DISEASE	Alcoholic Liver Diseases|Liver Diseases, Alcoholic	4	4	4.97834e-05	ALDH2, ADH1C, ADH1B, TNF	100	10	12971	51.884	0.154413	0.00134176	0.00124936
GAD_DISEASE	Fatigue Syndrome, Chronic|fatigue syndrome; postviral	4	4	4.97834e-05	MAOB, MAOA, NR3C1, SLC6A4	100	10	12971	51.884	0.154413	0.00134176	0.00124936
GAD_DISEASE	BMI	5	5	5.67931e-05	MAOA, PPARG, ADRB2, SLC6A3, SLC6A4	100	28	12971	23.1625	0.174149	0.00150658	0.00140284
GAD_DISEASE	migraine	5	5	5.67931e-05	MAOB, MAOA, F2, ESR1, SLC6A4	100	28	12971	23.1625	0.174149	0.00150658	0.00140284
GAD_DISEASE	Fibromyalgia	4	4	6.80729e-05	MAOA, NOS3, SLC6A3, SLC6A4	100	11	12971	47.1673	0.204946	0.00176414	0.00164265
GAD_DISEASE	mammographic density	4	4	6.80729e-05	AR, PGR, CYP19A1, CYP17A1	100	11	12971	47.1673	0.204946	0.00176414	0.00164265
GAD_DISEASE	Hot Flashes	4	4	6.80729e-05	CYP3A4, ESR1, CYP19A1, CYP17A1	100	11	12971	47.1673	0.204946	0.00176414	0.00164265
GAD_DISEASE	cardiovascular disease	6	6	8.45144e-05	NOS3, ADRB1, ADRB2, NR3C1, ESR1, TNF	100	59	12971	13.1908	0.247791	0.0021735	0.00202383
GAD_DISEASE	ADHD | attention deficit hyperactivity disorder	4	4	9.02612e-05	MAOA, TNF, SLC6A3, SLC6A4	100	12	12971	43.2367	0.262216	0.0022231	0.00207001
GAD_DISEASE	Endometrial Neoplasms|	4	4	9.02612e-05	CASP3, PGR, CYP19A1, CYP17A1	100	12	12971	43.2367	0.262216	0.0022231	0.00207001
GAD_DISEASE	Coronary Disease|Hypertension	4	4	9.02612e-05	ADRB1, PPARG, ADRB2, F2	100	12	12971	43.2367	0.262216	0.0022231	0.00207001
GAD_DISEASE	Esophageal Neoplasms	4	4	9.02612e-05	ALDH2, ADH1C, ADH1B, PDE4D	100	12	12971	43.2367	0.262216	0.0022231	0.00207001
GAD_DISEASE	Alcoholism|	4	4	9.02612e-05	GABRA2, ALDH2, ADH1B, SLC6A4	100	12	12971	43.2367	0.262216	0.0022231	0.00207001
GAD_DISEASE	Brain Ischemia|Stroke	7	7	9.04022e-05	NOS3, PDE4D, PPARG, ADRB2, F2, TNF, SLC6A4	100	96	12971	9.45802	0.262566	0.0022231	0.00207001
GAD_DISEASE	Premature Birth	7	7	0.000101397	ADH1B, PGR, ADRB2, NR3C1, CYP19A1, TNF, SLC6A4	100	98	12971	9.265	0.289384	0.00247541	0.00230494
GAD_DISEASE	Metabolic Syndrome X	6	6	0.000107283	ALDH2, PPARG, CYP3A4, TNF, ADRA2A, SLC6A4	100	62	12971	12.5526	0.30334	0.00260027	0.00242121
GAD_DISEASE	Abortion, Habitual	5	5	0.000110231	NOS3, PGR, F2, ESR1, TNF	100	33	12971	19.653	0.310225	0.00265264	0.00246997
GAD_DISEASE	bone mass	4	4	0.00011669	ESR1, CYP19A1, TNF, CYP17A1	100	13	12971	39.9108	0.325073	0.00273293	0.00254474
GAD_DISEASE	Alcoholism|Liver Cirrhosis, Alcoholic	4	4	0.00011669	ALDH2, ADH1C, ADH1B, PPARG	100	13	12971	39.9108	0.325073	0.00273293	0.00254474
GAD_DISEASE	Pancreatitis, Alcoholic	4	4	0.00011669	ALDH2, ADH1C, ADH1B, TNF	100	13	12971	39.9108	0.325073	0.00273293	0.00254474
GAD_DISEASE	ovarian cancer	12	12	0.000116813	PTPN1, AR, NT5E, NOS3, BCL2, PGR, CYP3A4, ESR1, CYP19A1, TNF, CYP17A1, PTGS1	100	370	12971	4.20681	0.325353	0.00273293	0.00254474
GAD_DISEASE	dementia	6	6	0.000134491	APP, MAOA, PPARG, NR3C1, ESR1, TNF	100	65	12971	11.9732	0.364365	0.00312483	0.00290964
GAD_DISEASE	aging	5	5	0.000139409	AR, ESR1, CYP19A1, TNF, CYP17A1	100	35	12971	18.53	0.374812	0.00321692	0.00299539
GAD_DISEASE	infertility, male	6	6	0.000144642	AR, NOS3, PDE3A, ESR1, CYP19A1, TNF	100	66	12971	11.7918	0.385738	0.00331495	0.00308668
GAD_DISEASE	osteonecrosis	4	4	0.000147692	ALDH2, ADH1B, NOS3, CAT	100	14	12971	37.06	0.39202	0.00333944	0.00310947
GAD_DISEASE	Natural Menopause|Obesity|POF - Premature ovarian failure|POLYCYSTIC OVARIAN SYNDROME|Polycystic Ovary Syndrome|Primary Ovarian Insufficiency|Puberty, Delayed|Puberty, Precocious|Thrombophilia|Tobacco Use Disorder	4	4	0.000147692	SRD5A1, PGR, PPARG, TNF	100	14	12971	37.06	0.39202	0.00333944	0.00310947
GAD_DISEASE	Endometriosis|Leiomyoma|Uterine Neoplasms	3	3	0.000172146	AR, PPARG, ESR1	100	3	12971	129.71	0.440108	0.0037177	0.00346169
GAD_DISEASE	Carcinoma, Squamous Cell|Mouth Neoplasms|Pharyngeal Neoplasms|Squamous cell carcinoma	3	3	0.000172146	ALDH2, ADH1C, ADH1B	100	3	12971	129.71	0.440108	0.0037177	0.00346169
GAD_DISEASE	attention deficit disorder	3	3	0.000172146	MAOA, SLC6A3, SLC6A4	100	3	12971	129.71	0.440108	0.0037177	0.00346169
GAD_DISEASE	medicamentosa-like dermatitis, trichloroethylene	3	3	0.000172146	ALDH2, ADH1C, ADH1B	100	3	12971	129.71	0.440108	0.0037177	0.00346169
GAD_DISEASE	alcohol abuse cirrhosis, alcoholic pancreatitis, chronic	3	3	0.000172146	ALDH2, ADH1C, ADH1B	100	3	12971	129.71	0.440108	0.0037177	0.00346169
GAD_DISEASE	Adenocarcinoma|Prostatic Neoplasms	3	3	0.000172146	AR, CYP19A1, CYP17A1	100	3	12971	129.71	0.440108	0.0037177	0.00346169
GAD_DISEASE	left ventricular ejection fraction troponin, cardiac	3	3	0.000172146	ADRB1, ADRB2, ADRA2A	100	3	12971	129.71	0.440108	0.0037177	0.00346169
GAD_DISEASE	hypertension, pregnancy induced	4	4	0.000183594	NOS3, ADRB2, F2, NR3C2	100	15	12971	34.5893	0.461294	0.00393967	0.00366837
GAD_DISEASE	Pancreatitis	5	5	0.000193118	PRSS1, ALDH2, ADH1B, CAT, TNF	100	38	12971	17.0671	0.478309	0.00411782	0.00383426
GAD_DISEASE	Stomach Neoplasms	7	7	0.000222019	ALDH2, ADH1C, ADH1B, CYP19A1, TNF, CYP17A1, PTGS1	100	113	12971	8.03513	0.526718	0.00470221	0.0043784
GAD_DISEASE	methamphetamine abuse	4	4	0.000224712	AKT1, TNF, SLC6A3, SLC6A4	100	16	12971	32.4275	0.530994	0.00470221	0.0043784
GAD_DISEASE	cirrhosis, alcoholic	4	4	0.000224712	ALDH2, ADH1C, ADH1B, TNF	100	16	12971	32.4275	0.530994	0.00470221	0.0043784
GAD_DISEASE	diabetes, type 2; liver disease	5	5	0.000236323	MAOB, NOS3, PPARG, CYP3A4, TNF	100	40	12971	16.2138	0.54899	0.00491464	0.0045762
GAD_DISEASE	Glomerulonephritis, IGA	7	7	0.000244246	TPO, ADH1B, NOS3, ADRB2, CYP3A4, ESR1, TNF	100	115	12971	7.89539	0.560872	0.00504824	0.00470061
GAD_DISEASE	Acute Coronary Syndrome|	6	6	0.000264622	NOS3, PPARG, ADRB2, F2, ESR1, TNF	100	75	12971	10.3768	0.590012	0.00540695	0.00503461
GAD_DISEASE	metabolic syndrome	8	8	0.000264811	AR, NOS3, PDE4D, PPARG, ADRB2, ESR1, TNF, PTGS1	100	165	12971	6.28897	0.590273	0.00540695	0.00503461
GAD_DISEASE	Carcinoma, Hepatocellular|Liver Neoplasms	5	5	0.000286077	ALDH2, ADH1B, CYP19A1, TNF, CYP17A1	100	42	12971	15.4417	0.618609	0.00580598	0.00540616
GAD_DISEASE	Apoplexy|Myocardial ischemia|Stroke	4	4	0.000323827	NOS3, PDE4D, F2, TNF	100	18	12971	28.8244	0.66417	0.00648395	0.00603744
GAD_DISEASE	obsessive Compulsive Disorder	4	4	0.000323827	MAOA, TNF, SLC6A3, SLC6A4	100	18	12971	28.8244	0.66417	0.00648395	0.00603744
GAD_DISEASE	blood pressure, arterial; heart rate; adrenaline; coronary flow velocity; ECG; noradrenaline	3	3	0.000342577	ADRB1, ADRB2, ADRA1A	100	4	12971	97.2825	0.684735	0.00648395	0.00603744
GAD_DISEASE	Cadaver|Prostatic Hyperplasia	3	3	0.000342577	AR, CYP19A1, CYP17A1	100	4	12971	97.2825	0.684735	0.00648395	0.00603744
GAD_DISEASE	Asthma|Drug Hypersensitivity|	3	3	0.000342577	ADORA2A, ADORA2B, ADORA1	100	4	12971	97.2825	0.684735	0.00648395	0.00603744
GAD_DISEASE	cirrhosis; pancreatitis; esophageal cancer	3	3	0.000342577	ALDH2, ADH1C, ADH1B	100	4	12971	97.2825	0.684735	0.00648395	0.00603744
GAD_DISEASE	Alcoholism|Bone necrosis|Liver Cirrhosis|Osteonecrosis|Pancreatitis, Alcoholic	3	3	0.000342577	ALDH2, ADH1C, ADH1B	100	4	12971	97.2825	0.684735	0.00648395	0.00603744
GAD_DISEASE	Cardiovascular Diseases|Myocardial Ischemia	3	3	0.000342577	ADRB1, ADRB2, ADRA1A	100	4	12971	97.2825	0.684735	0.00648395	0.00603744
GAD_DISEASE	Alcoholic Intoxication, Chronic|Drug Allergy	3	3	0.000342577	ALDH2, ADH1C, ADH1B	100	4	12971	97.2825	0.684735	0.00648395	0.00603744
GAD_DISEASE	Alcoholic Liver Diseases|Alcoholism|Liver Diseases, Alcoholic	3	3	0.000342577	ALDH2, ADH1C, ADH1B	100	4	12971	97.2825	0.684735	0.00648395	0.00603744
GAD_DISEASE	congestive heart failure	3	3	0.000342577	NOS3, ADRB1, ADRA2C	100	4	12971	97.2825	0.684735	0.00648395	0.00603744
GAD_DISEASE	Coronary Restenosis|Postoperative Complications	3	3	0.000342577	MAOA, TNF, SLC6A4	100	4	12971	97.2825	0.684735	0.00648395	0.00603744
GAD_DISEASE	esophageal cancer	6	6	0.000357674	ALDH2, PIK3CA, ADH1B, AKT1, PPARG, TNF	100	80	12971	9.72825	0.700374	0.00673186	0.00626829
GAD_DISEASE	Marijuana Abuse|Psychoses, Substance-Induced	5	5	0.000374202	CHRM3, GABRA6, AKT1, ADRA2C, SLC6A3	100	45	12971	14.4122	0.716607	0.00700381	0.0065215
GAD_DISEASE	Pre-Eclampsia	6	6	0.000378922	NOS3, PPARG, F2, ESR1, TNF, CYP17A1	100	81	12971	9.60815	0.72108	0.00705298	0.00656729
GAD_DISEASE	hormone disturbance	4	4	0.00038242	PGR, ESR1, CYP19A1, CYP17A1	100	19	12971	27.3074	0.724349	0.00707897	0.00659149
GAD_DISEASE	Esophageal Neoplasms|Head and Neck Neoplasms|Laryngeal neoplasm|Laryngeal Neoplasms|Mouth Neoplasms|Oesophageal neoplasm|Pharyngeal Neoplasms	4	4	0.00044742	ALDH2, ADH1C, ADH1B, CYP3A4	100	20	12971	25.942	0.778581	0.00814789	0.0075868
GAD_DISEASE	overall effect	4	4	0.00044742	ADH1C, ADH1B, PGR, ESR1	100	20	12971	25.942	0.778581	0.00814789	0.0075868
GAD_DISEASE	Coronary Disease|Hyperlipoproteinemia Type II	4	4	0.00044742	ADRB1, ADRB2, F2, ADRA1A	100	20	12971	25.942	0.778581	0.00814789	0.0075868
GAD_DISEASE	Cerebral Palsy|	4	4	0.000519108	NOS3, PDE4D, ADRB2, F2	100	21	12971	24.7067	0.826109	0.00940255	0.00875506
GAD_DISEASE	Chorioamnionitis|Fetal Membranes, Premature Rupture|Infection of amniotic sac and membranes	8	8	0.000545933	NOS3, PPARG, ADRB2, F2, LYZ, ESR1, TNF, PTGS1	100	186	12971	5.57892	0.841143	0.00983555	0.00915825
GAD_DISEASE	Chorioamnionitis|Fetal Membranes, Premature Rupture|Infection of amniotic sac and membranes|Obstetric Labor, Premature|Pre-Eclampsia|Premature Birth	8	8	0.00056367	NOS3, PPARG, ADRB2, F2, LYZ, ESR1, TNF, PTGS1	100	187	12971	5.54909	0.850362	0.00986593	0.00918653
GAD_DISEASE	menarche; menopause	3	3	0.000568118	NOS3, ESR1, CYP17A1	100	5	12971	77.826	0.85259	0.00986593	0.00918653
GAD_DISEASE	blood pressure, arterial; heart rate	3	3	0.000568118	ALDH2, ADH1B, ADRB1	100	5	12971	77.826	0.85259	0.00986593	0.00918653
GAD_DISEASE	Alcoholism|Diseases in Twins|Flushing	3	3	0.000568118	ALDH2, ADH1C, ADH1B	100	5	12971	77.826	0.85259	0.00986593	0.00918653
GAD_DISEASE	Coronary Disease|Coronary heart disease|Diabetes mellitus	3	3	0.000568118	ALDH2, ADH1C, ADH1B	100	5	12971	77.826	0.85259	0.00986593	0.00918653
GAD_DISEASE	androgen levels	3	3	0.000568118	AR, ESR1, CYP17A1	100	5	12971	77.826	0.85259	0.00986593	0.00918653
GAD_DISEASE	obesity|hypertension	3	3	0.000568118	ADRB1, PPARG, ADRB2	100	5	12971	77.826	0.85259	0.00986593	0.00918653
GAD_DISEASE	Retinopathy of Prematurity	4	4	0.000597754	ALDH2, NOS3, ESR1, TNF	100	22	12971	23.5836	0.866604	0.0103273	0.00961617
GAD_DISEASE	head and neck cancer	6	6	0.000647699	AR, ALDH2, ADH1C, ADH1B, CAT, TNF	100	91	12971	8.55231	0.887275	0.0111332	0.0103665
GAD_DISEASE	panic disorder	5	5	0.000652742	ADORA2A, MAOA, ADORA1, PGR, SLC6A4	100	52	12971	12.4721	0.889175	0.0111629	0.0103942
GAD_DISEASE	Insulin Resistance|Obesity	4	4	0.000683623	PPARG, PIK3CB, NR3C1, TNF	100	23	12971	22.5583	0.900133	0.0115156	0.0107226
GAD_DISEASE	Perioperative genomic profiles	4	4	0.000683623	ADRB2, F2, CYP3A4, TNF	100	23	12971	22.5583	0.900133	0.0115156	0.0107226
GAD_DISEASE	Breast Neoplasms	4	4	0.000683623	PIK3CA, ATM, ESR1, CYP19A1	100	23	12971	22.5583	0.900133	0.0115156	0.0107226
GAD_DISEASE	Coronary Heart Disease	5	5	0.000701927	NOS3, ADRB1, PPARG, ADRB2, TNF	100	53	12971	12.2368	0.906109	0.0117069	0.0109007
GAD_DISEASE	Apoplexy|Brain Ischemia|Stroke	5	5	0.000701927	NOS3, PDE4D, F2, ESR1, TNF	100	53	12971	12.2368	0.906109	0.0117069	0.0109007
GAD_DISEASE	chronic obstructive pulmonary disease/COPD	5	5	0.000808073	NOS3, PDE4D, ADRB2, TNF, SLC6A4	100	55	12971	11.7918	0.934355	0.0134108	0.0124873
GAD_DISEASE	bone density; osteoporosis	3	3	0.000847936	AR, TNF, CYP17A1	100	6	12971	64.855	0.942611	0.0136684	0.0127271
GAD_DISEASE	premenstrual dysphoric disorder	3	3	0.000847936	MAOA, ESR1, SLC6A4	100	6	12971	64.855	0.942611	0.0136684	0.0127271
GAD_DISEASE	antisocial personality disorder	3	3	0.000847936	MAOA, SLC6A3, SLC6A4	100	6	12971	64.855	0.942611	0.0136684	0.0127271
GAD_DISEASE	alcohol dependency	3	3	0.000847936	ALDH2, ADH1C, ADH1B	100	6	12971	64.855	0.942611	0.0136684	0.0127271
GAD_DISEASE	Cardiomyopathy, Hypertrophic|Hypertrophy, Left Ventricular	3	3	0.000847936	AR, ESR1, CYP19A1	100	6	12971	64.855	0.942611	0.0136684	0.0127271
GAD_DISEASE	temperament	3	3	0.000847936	ADRA1A, ADRA2A, SLC6A4	100	6	12971	64.855	0.942611	0.0136684	0.0127271
GAD_DISEASE	Pancreatitis, Chronic	4	4	0.000878055	PRSS1, CAT, PRSS3, TNF	100	25	12971	20.7536	0.948153	0.0140865	0.0131165
GAD_DISEASE	stroke, ischemic	5	5	0.00092508	NOS3, PDE4D, F2, TNF, SLC6A4	100	57	12971	11.3781	0.955756	0.0147009	0.0136886
GAD_DISEASE	Esophageal Cancer	5	5	0.00092508	AR, ALDH2, ADH1C, ADH1B, BCL2	100	57	12971	11.3781	0.955756	0.0147009	0.0136886
GAD_DISEASE	Hypertension/complications*	4	4	0.000987111	PDE4D, PPARG, TNF, PTGS1	100	26	12971	19.9554	0.964107	0.0154792	0.0144133
GAD_DISEASE	Recurrence|Venous Thromboembolism	5	5	0.00098784	NOS3, PPARG, ADRB2, F2, TNF	100	58	12971	11.1819	0.964195	0.0154792	0.0144133
GAD_DISEASE	Menopause	5	5	0.00098784	NOS3, F2, ESR1, CYP19A1, CYP17A1	100	58	12971	11.1819	0.964195	0.0154792	0.0144133
GAD_DISEASE	Esophageal Neoplasms|Head and Neck Neoplasms|Laryngeal Neoplasms|Mouth Neoplasms|Pharyngeal Neoplasms	5	5	0.00105354	ALDH2, ADH1C, ADH1B, CYP3A4, TNF	100	59	12971	10.9924	0.971311	0.0163805	0.0152525
GAD_DISEASE	HIV	8	8	0.00105508	PIK3CA, NOS3, PIK3CD, AKT1, PIK3CB, CYP3A4, TNF, PIK3CG	100	208	12971	4.98885	0.97146	0.0163805	0.0152525
GAD_DISEASE	Heroin Dependence	4	4	0.00110438	MAOA, OPRK1, SLC6A3, SLC6A4	100	27	12971	19.2163	0.975832	0.0169121	0.0157474
GAD_DISEASE	Tourette Syndrome	4	4	0.00110438	MAOA, SLC6A3, ADRA2A, SLC6A4	100	27	12971	19.2163	0.975832	0.0169121	0.0157474
GAD_DISEASE	Chronic ulcerative colitis|Colitis, Ulcerative|Crohn Disease|Crohn's disease	4	4	0.00110438	PPARG, F2, NR3C1, TNF	100	27	12971	19.2163	0.975832	0.0169121	0.0157474
GAD_DISEASE	autonomic nervous system function	3	3	0.0011812	ADRA2C, ADRA1A, ADRA2A	100	7	12971	55.59	0.981348	0.0173021	0.0161106
GAD_DISEASE	Hyperandrogenism	3	3	0.0011812	SRD5A1, PPARG, CYP19A1	100	7	12971	55.59	0.981348	0.0173021	0.0161106
GAD_DISEASE	menarche menopause	3	3	0.0011812	ESR1, CYP19A1, CYP17A1	100	7	12971	55.59	0.981348	0.0173021	0.0161106
GAD_DISEASE	risperidone-induced extrapyramidal symptoms	3	3	0.0011812	MAOB, MAOA, SLC6A3	100	7	12971	55.59	0.981348	0.0173021	0.0161106
GAD_DISEASE	migraine; migraine with aura	3	3	0.0011812	MAOB, MAOA, SLC6A4	100	7	12971	55.59	0.981348	0.0173021	0.0161106
GAD_DISEASE	migraine migraine with aura	3	3	0.0011812	ADORA2A, SLC6A3, SLC6A4	100	7	12971	55.59	0.981348	0.0173021	0.0161106
GAD_DISEASE	drug dependence	3	3	0.0011812	ADH1C, ADH1B, ADH1A	100	7	12971	55.59	0.981348	0.0173021	0.0161106
GAD_DISEASE	heart muscle disease, alcoholic	3	3	0.0011812	ALDH2, ADH1C, ADH1B	100	7	12971	55.59	0.981348	0.0173021	0.0161106
GAD_DISEASE	HIV Infections|Lipodystrophy	3	3	0.0011812	NOS3, PPARG, TNF	100	7	12971	55.59	0.981348	0.0173021	0.0161106
GAD_DISEASE	Liver Cirrhosis, Alcoholic|Pancreatitis, Alcoholic	3	3	0.0011812	ALDH2, ADH1C, ADH1B	100	7	12971	55.59	0.981348	0.0173021	0.0161106
GAD_DISEASE	Lupus Erythematosus, Systemic|Systemic lupus erythematosus	7	7	0.00126827	NOS3, BCL2, PPARG, F2, ESR1, CYP19A1, TNF	100	157	12971	5.78325	0.986095	0.018497	0.0172233
GAD_DISEASE	Long QT Syndrome	4	4	0.00136447	ADRB1, ADRB2, SCN5A, ADRA2C	100	29	12971	17.891	0.989948	0.0198142	0.0184497
GAD_DISEASE	Brain Ischemia|Hypertension|Osteoporosis|Stroke	5	5	0.00142865	NOS3, PPARG, ADRB2, F2, TNF	100	64	12971	10.1336	0.991905	0.0206571	0.0192346
GAD_DISEASE	Conduct Disorder	4	4	0.00150772	PDE10A, MAOA, ADH1B, SLC6A4	100	30	12971	17.2947	0.993801	0.0216979	0.0202037
GAD_DISEASE	Amyotrophic Lateral Sclerosis|	5	5	0.00151351	NOS3, PPARG, ADRB2, F2, TNF	100	65	12971	9.97769	0.993921	0.0216979	0.0202037
GAD_DISEASE	depressive disorder, major; bipolar disorder	3	3	0.00156711	GABRA1, MAOA, SLC6A4	100	8	12971	48.6412	0.994927	0.0221831	0.0206555
GAD_DISEASE	cardiac death	3	3	0.00156711	NOS3, ADRB2, SCN5A	100	8	12971	48.6412	0.994927	0.0221831	0.0206555
GAD_DISEASE	Femur Head Necrosis	3	3	0.00156711	NOS3, PPARG, CYP3A4	100	8	12971	48.6412	0.994927	0.0221831	0.0206555
GAD_DISEASE	restenosis	5	5	0.00160182	NOS3, PPARG, ADRB2, F2, TNF	100	66	12971	9.82652	0.995487	0.0225797	0.0210248
GAD_DISEASE	Breast Neoplasms|Mammary Neoplasms	4	4	0.00199288	AR, PGR, ESR1, SLC6A4	100	33	12971	15.7224	0.998794	0.0276816	0.0257754
GAD_DISEASE	neuroticism	3	3	0.00200484	MAOA, PDE4D, SLC6A4	100	9	12971	43.2367	0.998842	0.0276816	0.0257754
GAD_DISEASE	body mass obesity	3	3	0.00200484	MAOB, MAOA, SLC6A3	100	9	12971	43.2367	0.998842	0.0276816	0.0257754
GAD_DISEASE	Syncope, Vasovagal	3	3	0.00200484	NOS3, ADRB1, SLC6A4	100	9	12971	43.2367	0.998842	0.0276816	0.0257754
GAD_DISEASE	human spermatogenic defect	3	3	0.00200484	ESR1, CYP19A1, CYP17A1	100	9	12971	43.2367	0.998842	0.0276816	0.0257754
GAD_DISEASE	cognitive trait	6	6	0.00207312	CHRM2, APP, AR, NOS3, CAT, CTSD	100	118	12971	6.59542	0.99908	0.0285075	0.0265444
GAD_DISEASE	Aging/ Telomere Length	6	6	0.00215115	CHRM2, APP, AR, NOS3, CAT, CTSD	100	119	12971	6.54	0.999293	0.0294603	0.0274316
GAD_DISEASE	Cerebral Palsy	4	4	0.00217372	NOS3, ADRB2, F2, TNF	100	34	12971	15.26	0.999345	0.0296489	0.0276071
GAD_DISEASE	Coronary Disease	8	8	0.0023357	RXRA, PDE10A, MAOA, NOS3, CAT, PDE4A, F2, TNF	100	239	12971	4.34176	0.999621	0.0317297	0.0295447
GAD_DISEASE	Psychiatric Disorders	5	5	0.00244129	ACHE, GRIA2, MAOA, ADRA2C, SLC6A4	100	74	12971	8.76419	0.999735	0.0328162	0.0305564
GAD_DISEASE	Gastroparesis	3	3	0.00249361	ADRA1D, ADRA1B, ADRA1A	100	10	12971	38.913	0.999778	0.0328162	0.0305564
GAD_DISEASE	Brain Ischemia|Myocardial Infarction|Stroke	3	3	0.00249361	AR, ADRB2, PTGS1	100	10	12971	38.913	0.999778	0.0328162	0.0305564
GAD_DISEASE	dyspepsia	3	3	0.00249361	ADRA2C, ADRA2A, SLC6A4	100	10	12971	38.913	0.999778	0.0328162	0.0305564
GAD_DISEASE	Pain	3	3	0.00249361	OPRK1, ADRB2, SLC6A4	100	10	12971	38.913	0.999778	0.0328162	0.0305564
GAD_DISEASE	bipolar schizoaffective disorder	3	3	0.00249361	GABRA2, GABRA1, GABRA6	100	10	12971	38.913	0.999778	0.0328162	0.0305564
GAD_DISEASE	antisocial behavioural traits	3	3	0.00249361	AR, MAOA, ESR1	100	10	12971	38.913	0.999778	0.0328162	0.0305564
GAD_DISEASE	left ventricular remodeling	3	3	0.00249361	ADRB1, ADRB2, ADRA2C	100	10	12971	38.913	0.999778	0.0328162	0.0305564
GAD_DISEASE	preeclampsia	5	5	0.00256392	NOS3, F2, ESR1, TNF, NR3C2	100	75	12971	8.64733	0.999825	0.0336103	0.0312958
GAD_DISEASE	thyroid cancer	6	6	0.00266514	ACHE, TPO, PIK3CA, ITPR1, PPARG, ITPR3	100	125	12971	6.22608	0.999875	0.0348018	0.0324052
GAD_DISEASE	preterm delivery	4	4	0.00299763	ALDH2, NOS3, ADRB2, TNF	100	38	12971	13.6537	0.999959	0.0388474	0.0361723
GAD_DISEASE	Neoplasms, Prostatic|Prostatic Neoplasms	3	3	0.00303261	AR, PDE11A, TNF	100	11	12971	35.3755	0.999964	0.0388474	0.0361723
GAD_DISEASE	precocious puberty	3	3	0.00303261	GABRA1, CYP3A4, NR3C1	100	11	12971	35.3755	0.999964	0.0388474	0.0361723
GAD_DISEASE	Cardiovascular Diseases|Inflammation	3	3	0.00303261	NOS3, PPARG, TNF	100	11	12971	35.3755	0.999964	0.0388474	0.0361723
GAD_DISEASE	Pain, Postoperative|Radius Fractures|Reflex Sympathetic Dystrophy	3	3	0.00303261	ADRB2, ADRA1A, TNF	100	11	12971	35.3755	0.999964	0.0388474	0.0361723
GAD_DISEASE	obesity|asthma	4	4	0.0032296	PDE4D, ADRB2, ADRA1B, TNF	100	39	12971	13.3036	0.999982	0.0410586	0.0382312
GAD_DISEASE	Carcinoma, Squamous Cell|Head and Neck Neoplasms|Squamous cell carcinoma	4	4	0.0032296	ALDH2, ADH1C, ADH1B, BCL2	100	39	12971	13.3036	0.999982	0.0410586	0.0382312
GAD_DISEASE	rheumatoid arthritis	7	7	0.00331488	AR, NOS3, PGR, ESR1, CYP19A1, TNF, CYP17A1	100	190	12971	4.77879	0.999986	0.0419844	0.0390932
GAD_DISEASE	Cardiomyopathy, Dilated|DCM - Dilated cardiomyopathy	4	4	0.0034723	ADRB1, ADRB2, SCN5A, TNF	100	40	12971	12.971	0.999992	0.0436499	0.040644
GAD_DISEASE	body mass	4	4	0.0034723	AR, ADRB1, ADRB2, ADRA2A	100	40	12971	12.971	0.999992	0.0436499	0.040644
GAD_DISEASE	Intelligence	3	3	0.00362108	CHRM2, CTSD, SLC6A3	100	12	12971	32.4275	0.999995	0.0448508	0.0417623
GAD_DISEASE	Atherosclerosis|Thrombosis	3	3	0.00362108	NOS3, F2, ESR1	100	12	12971	32.4275	0.999995	0.0448508	0.0417623
GAD_DISEASE	major depression	3	3	0.00362108	CHRM2, GABRA5, SLC6A4	100	12	12971	32.4275	0.999995	0.0448508	0.0417623
GAD_DISEASE	Thyroid Diseases	3	3	0.00362108	PDE10A, PDE4D, PDE8B	100	12	12971	32.4275	0.999995	0.0448508	0.0417623
GAD_DISEASE	Neoplasms, Germ Cell and Embryonal|Testicular Neoplasms	3	3	0.00425825	AR, PDE11A, CYP17A1	100	13	12971	29.9331	0.999999	0.0516044	0.0480508
GAD_DISEASE	Fatigue|Sleep Disorders|Sleep Initiation and Maintenance Disorders	3	3	0.00425825	NT5E, ADORA2A, ADORA1	100	13	12971	29.9331	0.999999	0.0516044	0.0480508
GAD_DISEASE	Insulin Resistance|Metabolic Syndrome X	3	3	0.00425825	PTPN1, AKT1, PPARG	100	13	12971	29.9331	0.999999	0.0516044	0.0480508
GAD_DISEASE	sex hormones	3	3	0.00425825	ESR1, CYP19A1, CYP17A1	100	13	12971	29.9331	0.999999	0.0516044	0.0480508
GAD_DISEASE	Liver Cirrhosis	3	3	0.00425825	ALDH2, TNF, ADRA2A	100	13	12971	29.9331	0.999999	0.0516044	0.0480508
GAD_DISEASE	personality disorders	3	3	0.00425825	MAOA, ADRB1, SLC6A4	100	13	12971	29.9331	0.999999	0.0516044	0.0480508
GAD_DISEASE	hearing loss	5	5	0.00438024	ADH1C, ADH1B, PPARG, TNF, SLC6A4	100	87	12971	7.4546	1	0.0528926	0.0492503
GAD_DISEASE	cardiovascular	4	4	0.00455331	NOS3, PPARG, ADRB2, SLC6A4	100	44	12971	11.7918	1	0.0547861	0.0510134
GAD_DISEASE	Multiple Sclerosis	12	12	0.0046888	CHRM2, CHRM3, NOS3, CASP3, GABRA3, BCL2, PDE4B, PPARG, ADRB2, NR3C1, ESR1, TNF	100	581	12971	2.67904	1	0.0562155	0.0523443
GAD_DISEASE	Neoplasms	6	6	0.00473935	ATM, PPARG, F2, CYP3A4, TNF, SLC6A4	100	143	12971	5.44238	1	0.0566201	0.0527211
GAD_DISEASE	longevity	10	10	0.00512815	POLA2, TPO, CAT, PPARG, PIK3CB, F2, ESR1, TNF, PIK3CG, SLC6A4	100	425	12971	3.052	1	0.0609651	0.0567668
GAD_DISEASE	Asthma|Bronchial Hyperreactivity|Hypersensitivity, Immediate	5	5	0.00513924	CHRM3, NOS3, ADRB2, ESR1, TNF	100	91	12971	7.12692	1	0.0609651	0.0567668
GAD_DISEASE	Adiponectin	4	4	0.00548365	DLG4, PDE3B, ADRB1, PPARG	100	47	12971	11.0391	1	0.0648225	0.0603586
GAD_DISEASE	Cellulitis|Obesity	3	3	0.00567561	NOS3, PPARG, ESR1	100	15	12971	25.942	1	0.066163	0.0616068
GAD_DISEASE	Infertility, Female	3	3	0.00567561	PGR, F2, CYP19A1	100	15	12971	25.942	1	0.066163	0.0616068
GAD_DISEASE	polycystic ovarian syndrome	3	3	0.00567561	NR3C1, CYP19A1, CYP17A1	100	15	12971	25.942	1	0.066163	0.0616068
GAD_DISEASE	breast cancer; ovarian cancer	3	3	0.00567561	AR, PGR, CYP3A4	100	15	12971	25.942	1	0.066163	0.0616068
GAD_DISEASE	Atrial Fibrillation	4	4	0.00616269	NOS3, ADRB1, SCN5A, ESR1	100	49	12971	10.5886	1	0.0715935	0.0666633
GAD_DISEASE	arthritis, juvenile	3	3	0.00645431	ESR1, CYP19A1, TNF	100	16	12971	24.3206	1	0.0742135	0.0691029
GAD_DISEASE	Dyskinesia, Drug-Induced	3	3	0.00645431	PDE4B, AKT1, SLC6A4	100	16	12971	24.3206	1	0.0742135	0.0691029
GAD_DISEASE	Pregnancy Complications	3	3	0.00645431	CAT, F2, TNF	100	16	12971	24.3206	1	0.0742135	0.0691029
GAD_DISEASE	Glaucoma, Open-Angle	4	4	0.0065202	ADRB1, ADRB2, NR3C1, TNF	100	50	12971	10.3768	1	0.0747162	0.069571
GAD_DISEASE	Menarche	4	4	0.00688983	CYP3A4, ESR1, CYP19A1, CYP17A1	100	51	12971	10.1733	1	0.0786842	0.0732658
GAD_DISEASE	Meningococcal Infections	3	3	0.00814806	ADRB1, ADRB2, TNF	100	18	12971	21.6183	1	0.0923478	0.0859885
GAD_DISEASE	testicular cancer	3	3	0.00814806	AR, CYP3A4, TNF	100	18	12971	21.6183	1	0.0923478	0.0859885
GAD_DISEASE	Insulin Resistance	6	6	0.00816849	AR, NOS3, ITPR1, PPARG, NR3C1, TNF	100	163	12971	4.7746	1	0.0923478	0.0859885
GAD_DISEASE	Arthritis, Rheumatoid	6	6	0.00880042	ADORA2A, PDE2A, CAT, PPARG, ADRB2, TNF	100	166	12971	4.68831	1	0.0991592	0.0923308
GAD_DISEASE	Hypertension|Obesity	3	3	0.0100188	ALDH2, PPARG, ADRB2	100	20	12971	19.4565	1	0.112137	0.104415
GAD_DISEASE	Colonic Neoplasms|Rectal Neoplasms	3	3	0.0100188	ALDH2, PIK3CA, AKT1	100	20	12971	19.4565	1	0.112137	0.104415
GAD_DISEASE	Cystic Fibrosis	4	4	0.0102946	NOS3, ADRB2, TNF, PTGS1	100	59	12971	8.7939	1	0.114243	0.106376
GAD_DISEASE	Coronary Disease|Coronary heart disease|Inflammation|Insulin Resistance	4	4	0.0102946	RXRA, NOS3, PPARG, CTSD	100	59	12971	8.7939	1	0.114243	0.106376
GAD_DISEASE	Glucose	7	7	0.0103087	PDE11A, PDE1C, BCL2, PDE6C, ITPR3, PDE8A, SLC6A4	100	241	12971	3.76751	1	0.114243	0.106376
GAD_DISEASE	Biliary Tract Neoplasms|Inflammation	3	3	0.0110188	NOS3, PPARG, TNF	100	21	12971	18.53	1	0.121712	0.113331
GAD_DISEASE	Atopic asthma	3	3	0.0120609	ADRB2, NR3C1, TNF	100	22	12971	17.6877	1	0.132355	0.123241
GAD_DISEASE	Cerebral Infarction	3	3	0.0120609	F2, ESR1, TNF	100	22	12971	17.6877	1	0.132355	0.123241
GAD_DISEASE	pancreatic cancer	4	4	0.0128382	ADH1C, ADH1B, ATM, TNF	100	64	12971	8.10688	1	0.140429	0.130758
GAD_DISEASE	cardiovascular risk	3	3	0.0131444	NOS3, PPARG, F2	100	23	12971	16.9187	1	0.143312	0.133443
GAD_DISEASE	Cardiovascular Diseases|	4	4	0.0145218	ADH1C, NOS3, F2, TNF	100	67	12971	7.74388	1	0.144318	0.13438
GAD_DISEASE	epilepsy	4	4	0.0145218	GABRA1, MAOA, GABRA5, CYP3A4	100	67	12971	7.74388	1	0.144318	0.13438
GAD_DISEASE	diabetes, type 1	6	6	0.0148033	NOS3, PPARG, ITPR3, ADRB2, SCN5A, TNF	100	189	12971	4.11778	1	0.144318	0.13438
GAD_DISEASE	diabetes, type 1	6	6	0.0151138	AR, NOS3, CAT, BCL2, ITPR3, TNF	100	190	12971	4.09611	1	0.144318	0.13438
GAD_DISEASE	heart rate; left ventricular funtion	2	2	0.0152072	ADRB1, ADRB2	100	2	12971	129.71	1	0.144318	0.13438
GAD_DISEASE	alcohol elimination	2	2	0.0152072	ADH1C, ADH1B	100	2	12971	129.71	1	0.144318	0.13438
GAD_DISEASE	alcohol effects	2	2	0.0152072	GABRA2, SLC6A4	100	2	12971	129.71	1	0.144318	0.13438
GAD_DISEASE	esophageal cancer; Barrett's esophagus	2	2	0.0152072	PIK3CA, PIK3CB	100	2	12971	129.71	1	0.144318	0.13438
GAD_DISEASE	pathologic gambling	2	2	0.0152072	MAOA, SLC6A4	100	2	12971	129.71	1	0.144318	0.13438
GAD_DISEASE	aortic compliance blood pressure, arterial cardiac output heart rate hypertension left ventricular mass systemic vascular resistance	2	2	0.0152072	ADRA2C, ADRA2A	100	2	12971	129.71	1	0.144318	0.13438
GAD_DISEASE	anxiety response	2	2	0.0152072	ADORA2A, ADORA1	100	2	12971	129.71	1	0.144318	0.13438
GAD_DISEASE	Heart Failure|Ventricular Dysfunction, Left|Ventricular Remodeling	2	2	0.0152072	ADRB1, ADRB2	100	2	12971	129.71	1	0.144318	0.13438
GAD_DISEASE	Dyslipidemias|Insulin Resistance	2	2	0.0152072	AR, CAT	100	2	12971	129.71	1	0.144318	0.13438
GAD_DISEASE	Hypertension|Myocardial Infarction|Stroke	2	2	0.0152072	ADRB1, ADRB2	100	2	12971	129.71	1	0.144318	0.13438
GAD_DISEASE	alcoholism and alcoholic liver disease	2	2	0.0152072	ADH1C, ADH1B	100	2	12971	129.71	1	0.144318	0.13438
GAD_DISEASE	depression; alcohol withdrawal	2	2	0.0152072	SLC6A3, SLC6A4	100	2	12971	129.71	1	0.144318	0.13438
GAD_DISEASE	mortality in trauma patients	2	2	0.0152072	ADRB2, ADRA1A	100	2	12971	129.71	1	0.144318	0.13438
GAD_DISEASE	alcohol abuse; neuroticism	2	2	0.0152072	GABRA6, SLC6A4	100	2	12971	129.71	1	0.144318	0.13438
GAD_DISEASE	Tachycardia	2	2	0.0152072	ADRB1, ADRA2C	100	2	12971	129.71	1	0.144318	0.13438
GAD_DISEASE	urinary tract symptoms, prostate volume, uroflow and PSA	2	2	0.0152072	CYP3A4, CYP19A1	100	2	12971	129.71	1	0.144318	0.13438
GAD_DISEASE	alcohol abuse; liver disease, alcoholic	2	2	0.0152072	ALDH2, ADH1B	100	2	12971	129.71	1	0.144318	0.13438
GAD_DISEASE	cognitive function depression	2	2	0.0152072	NR3C1, NR3C2	100	2	12971	129.71	1	0.144318	0.13438
GAD_DISEASE	endurance	2	2	0.0152072	ADRB2, ADRA2A	100	2	12971	129.71	1	0.144318	0.13438
GAD_DISEASE	Diabetes Mellitus|Hypertension|Obesity	2	2	0.0152072	NR3C1, TNF	100	2	12971	129.71	1	0.144318	0.13438
GAD_DISEASE	osteoporosis, postmenopausal; bone density; hormone disturbance	2	2	0.0152072	CYP19A1, CYP17A1	100	2	12971	129.71	1	0.144318	0.13438
GAD_DISEASE	postural tachycardia syndrome	2	2	0.0152072	NOS3, ADRB2	100	2	12971	129.71	1	0.144318	0.13438
GAD_DISEASE	opiate abuse	2	2	0.0152072	SLC6A3, SLC6A4	100	2	12971	129.71	1	0.144318	0.13438
GAD_DISEASE	Alcoholism|Carcinoma, Squamous Cell|Head and Neck Neoplasms|Squamous cell carcinoma	2	2	0.0152072	ALDH2, ADH1B	100	2	12971	129.71	1	0.144318	0.13438
GAD_DISEASE	Coronary Artery Disease|Death, Sudden, Cardiac|Tachycardia, Ventricular|Ventricular Fibrillation	2	2	0.0152072	ADRB1, ADRB2	100	2	12971	129.71	1	0.144318	0.13438
GAD_DISEASE	esophageal cancer; oropharyngolaryngeal cancers; stomach cancer	2	2	0.0152072	ALDH2, ADH1B	100	2	12971	129.71	1	0.144318	0.13438
GAD_DISEASE	left ventricular ejection fraction	2	2	0.0152072	ADRB1, ADRA2C	100	2	12971	129.71	1	0.144318	0.13438
GAD_DISEASE	Alcoholic Intoxication|Wounds and Injuries	2	2	0.0152072	ALDH2, ADH1B	100	2	12971	129.71	1	0.144318	0.13438
GAD_DISEASE	recurrent aphthous stomatitis	2	2	0.0152072	NOS3, TNF	100	2	12971	129.71	1	0.144318	0.13438
GAD_DISEASE	Alcoholism|Unconscious State|Unconsciousness	2	2	0.0152072	ALDH2, ADH1B	100	2	12971	129.71	1	0.144318	0.13438
GAD_DISEASE	angina, unstable	2	2	0.0152072	NOS3, TNF	100	2	12971	129.71	1	0.144318	0.13438
GAD_DISEASE	Acne Vulgaris|	2	2	0.0152072	AR, TNF	100	2	12971	129.71	1	0.144318	0.13438
GAD_DISEASE	Flushing|Hypersensitivity	2	2	0.0152072	ALDH2, ADH1B	100	2	12971	129.71	1	0.144318	0.13438
GAD_DISEASE	serotonin	2	2	0.0152072	MAOA, SLC6A4	100	2	12971	129.71	1	0.144318	0.13438
GAD_DISEASE	Heart Failure|Ventricular Dysfunction, Left	2	2	0.0152072	ADRB2, TNF	100	2	12971	129.71	1	0.144318	0.13438
GAD_DISEASE	vertigo, migraine-associated	2	2	0.0152072	PGR, ESR1	100	2	12971	129.71	1	0.144318	0.13438
GAD_DISEASE	Carcinoma, Squamous Cell|Cocarcinogenesis|Esophageal Neoplasms|Oesophageal neoplasm|Squamous cell carcinoma	2	2	0.0152072	ALDH2, ADH1B	100	2	12971	129.71	1	0.144318	0.13438
GAD_DISEASE	aggressive behavior Fragile X Syndrome	2	2	0.0152072	MAOA, SLC6A4	100	2	12971	129.71	1	0.144318	0.13438
GAD_DISEASE	Bronchial Hyperreactivity	2	2	0.0152072	ADRB2, TNF	100	2	12971	129.71	1	0.144318	0.13438
GAD_DISEASE	benign prostatic hyperplasia	2	2	0.0152072	AR, ADRA1A	100	2	12971	129.71	1	0.144318	0.13438
GAD_DISEASE	Fatigue|Hepatitis C	2	2	0.0152072	TNF, SLC6A4	100	2	12971	129.71	1	0.144318	0.13438
GAD_DISEASE	body mass energy metabolism	2	2	0.0152072	PPARG, ADRB2	100	2	12971	129.71	1	0.144318	0.13438
GAD_DISEASE	Tobacco Use Disorder	34	34	0.0154021	CHRM2, RYR1, APP, PDE1C, PDE1A, CHRNA7, ITPR1, ITPR2, ABAT, ITPR3, ADRA1B, ADRA1A, SLC6A3, SLC6A4, NR3C2, CYP17A1, TPO, PDE11A, RXRA, PDE4B, PDE6C, SCN5A, PDE8B, NCOA1, GABRA2, NCOA2, KCND2, PDE4D, ESR1, PDE10A, PDE5A, PGR, PDE7A, PDE9A	100	3034	12971	1.45357	1	0.144831	0.134857
GAD_DISEASE	Insulin	6	6	0.0154286	NOS3, ITPR1, ITPR2, PPARG, PIK3CB, TNF	100	191	12971	4.07466	1	0.144831	0.134857
GAD_DISEASE	Head and Neck Neoplasms	3	3	0.0154331	ALDH2, ADH1C, ADH1B	100	25	12971	15.5652	1	0.144831	0.134857
GAD_DISEASE	Body Weight|Obesity	3	3	0.0154331	PPARG, ESR1, SLC6A3	100	25	12971	15.5652	1	0.144831	0.134857
GAD_DISEASE	Heart Rate	7	7	0.0158548	NCOA1, CHRM2, NOS3, PDE3A, ITPR2, ADRB1, ADRB2	100	265	12971	3.4263	1	0.148374	0.138157
GAD_DISEASE	Carcinoma, Renal Cell|Kidney Neoplasms|Renal Cell Carcinoma	3	3	0.016637	CYP3A4, ESR1, TNF	100	26	12971	14.9665	1	0.154834	0.144172
GAD_DISEASE	glaucoma	3	3	0.016637	NOS3, ADRB1, ADRB2	100	26	12971	14.9665	1	0.154834	0.144172
GAD_DISEASE	drug-related genes	6	6	0.0174103	GAMT, ALDH2, ADH1C, ADH1B, ADH1A, CYP3A4	100	197	12971	3.95056	1	0.161585	0.150457
GAD_DISEASE	Cholesterol, HDL	9	9	0.0178084	GRIA2, APP, PDE10A, PDE4D, PDE4B, ITPR1, ADRB2, F2, ADRA2A	100	434	12971	2.68984	1	0.163686	0.152414
GAD_DISEASE	Hypothyroidism	3	3	0.0178796	TPO, PDE8B, TNF	100	27	12971	14.4122	1	0.163686	0.152414
GAD_DISEASE	Diabetes mellitus type II|Diabetes Mellitus, Type 2|Glucose Metabolism Disorders	3	3	0.0178796	PPARG, ADRB2, TNF	100	27	12971	14.4122	1	0.163686	0.152414
GAD_DISEASE	Sleep Disorders	3	3	0.0178796	ADORA2A, MAOA, SLC6A4	100	27	12971	14.4122	1	0.163686	0.152414
GAD_DISEASE	heart anomalies, congenital	3	3	0.0178796	NOS3, F2, TNF	100	27	12971	14.4122	1	0.163686	0.152414
GAD_DISEASE	Fractures, Bone	3	3	0.0191603	F2, ESR1, CYP19A1	100	28	12971	13.8975	1	0.174935	0.162889
GAD_DISEASE	Vitiligo	4	4	0.0202919	PDE10A, CAT, ESR1, TNF	100	76	12971	6.82684	1	0.184766	0.172042
GAD_DISEASE	Colonic Neoplasms|Microsatellite Instability	3	3	0.0204785	AR, PPARG, ESR1	100	29	12971	13.4183	1	0.185374	0.172608
GAD_DISEASE	Azoospermia	3	3	0.0218336	AR, BCL2, CYP3A4	100	30	12971	12.971	1	0.185374	0.172608
GAD_DISEASE	left ventricular hypertrophy	3	3	0.0218336	NOS3, ADRB1, PPARG	100	30	12971	12.971	1	0.185374	0.172608
GAD_DISEASE	cardiomyopathy; heart failure	2	2	0.0227247	ADRB1, ADRB2	100	3	12971	86.4733	1	0.185374	0.172608
GAD_DISEASE	skin cancer; squamous cell carcinoma	2	2	0.0227247	ADH1C, ADH1A	100	3	12971	86.4733	1	0.185374	0.172608
GAD_DISEASE	insulin; lipoproteins	2	2	0.0227247	ADRB2, NR3C1	100	3	12971	86.4733	1	0.185374	0.172608
GAD_DISEASE	Coronary Disease|Myocardial Ischemia	2	2	0.0227247	ADRB1, ADRB2	100	3	12971	86.4733	1	0.185374	0.172608
GAD_DISEASE	Tachycardia, Ventricular	2	2	0.0227247	ADRB1, ADRB2	100	3	12971	86.4733	1	0.185374	0.172608
GAD_DISEASE	Anemia, Sickle Cell|Apoplexy|Sickle cell anemia|Stroke	2	2	0.0227247	ADRB2, TNF	100	3	12971	86.4733	1	0.185374	0.172608
GAD_DISEASE	Stress	2	2	0.0227247	ADRB2, NR3C1	100	3	12971	86.4733	1	0.185374	0.172608
GAD_DISEASE	major psychiatric disorders	2	2	0.0227247	SLC6A3, SLC6A4	100	3	12971	86.4733	1	0.185374	0.172608
GAD_DISEASE	working memory	2	2	0.0227247	NR3C1, SLC6A3	100	3	12971	86.4733	1	0.185374	0.172608
GAD_DISEASE	Fibromyalgia|Syndrome	2	2	0.0227247	ADRB2, ADRA1A	100	3	12971	86.4733	1	0.185374	0.172608
GAD_DISEASE	Child Temperament	2	2	0.0227247	MAOA, SLC6A4	100	3	12971	86.4733	1	0.185374	0.172608
GAD_DISEASE	brain function	2	2	0.0227247	CHRNA7, SLC6A4	100	3	12971	86.4733	1	0.185374	0.172608
GAD_DISEASE	blood pressure, arterial heart rate left ventricular mass	2	2	0.0227247	ADRA1B, ADRA1A	100	3	12971	86.4733	1	0.185374	0.172608
GAD_DISEASE	hyperuicemia	2	2	0.0227247	ADRB2, ADRA2A	100	3	12971	86.4733	1	0.185374	0.172608
GAD_DISEASE	Depression, Postpartum|	2	2	0.0227247	MAOA, SLC6A4	100	3	12971	86.4733	1	0.185374	0.172608
GAD_DISEASE	methamphetamine induced psychosis	2	2	0.0227247	AKT1, ESR1	100	3	12971	86.4733	1	0.185374	0.172608
GAD_DISEASE	Asthma|Prenatal Exposure Delayed Effects|Respiratory Hypersensitivity|Respiratory Sounds	2	2	0.0227247	ADRB2, TNF	100	3	12971	86.4733	1	0.185374	0.172608
GAD_DISEASE	hepatitis, acute alcoholic	2	2	0.0227247	ALDH2, ADH1B	100	3	12971	86.4733	1	0.185374	0.172608
GAD_DISEASE	Temporomandibular Joint Disorders	2	2	0.0227247	ADRB2, ESR1	100	3	12971	86.4733	1	0.185374	0.172608
GAD_DISEASE	male-to-female transsexualism	2	2	0.0227247	AR, CYP19A1	100	3	12971	86.4733	1	0.185374	0.172608
GAD_DISEASE	Adiposity and Abdominal Obesity	2	2	0.0227247	NR3C1, ADRA2A	100	3	12971	86.4733	1	0.185374	0.172608
GAD_DISEASE	Premenstrual Syndrome	2	2	0.0227247	ESR1, SLC6A4	100	3	12971	86.4733	1	0.185374	0.172608
GAD_DISEASE	Carcinoma, Squamous Cell|Esophageal Neoplasms|Flushing|Oesophageal neoplasm|Squamous cell carcinoma	2	2	0.0227247	ALDH2, ADH1B	100	3	12971	86.4733	1	0.185374	0.172608
GAD_DISEASE	schizophrenia; psychoses; aggressive behavior; verbal fluency	2	2	0.0227247	MAOA, SLC6A4	100	3	12971	86.4733	1	0.185374	0.172608
GAD_DISEASE	depressive disorder, major endocrine regulation	2	2	0.0227247	MAOA, SLC6A4	100	3	12971	86.4733	1	0.185374	0.172608
GAD_DISEASE	Alcoholism|Carcinoma, Squamous Cell|Mouth Neoplasms	2	2	0.0227247	ADH1C, ADH1B	100	3	12971	86.4733	1	0.185374	0.172608
GAD_DISEASE	heart rate, resting	2	2	0.0227247	ADRB1, ADRB2	100	3	12971	86.4733	1	0.185374	0.172608
GAD_DISEASE	Syncope	2	2	0.0227247	ADORA2A, ADRB1	100	3	12971	86.4733	1	0.185374	0.172608
GAD_DISEASE	Insulin Resistance|Weight Loss	2	2	0.0227247	PPARG, TNF	100	3	12971	86.4733	1	0.185374	0.172608
GAD_DISEASE	platelet function	2	2	0.0227247	ADRA2A, PTGS1	100	3	12971	86.4733	1	0.185374	0.172608
GAD_DISEASE	mood disorder.	2	2	0.0227247	GABRA1, SLC6A4	100	3	12971	86.4733	1	0.185374	0.172608
GAD_DISEASE	resting heart rate	2	2	0.0227247	ADRB1, SCN5A	100	3	12971	86.4733	1	0.185374	0.172608
GAD_DISEASE	Respiratory Tract Diseases	2	2	0.0227247	CAT, TNF	100	3	12971	86.4733	1	0.185374	0.172608
GAD_DISEASE	Bronchial Hyperreactivity|Wounds and Injuries	2	2	0.0227247	ADRB2, ADRA1A	100	3	12971	86.4733	1	0.185374	0.172608
GAD_DISEASE	erythrocyte catalase activity	2	2	0.0227247	CAT, TNF	100	3	12971	86.4733	1	0.185374	0.172608
GAD_DISEASE	Anorexia Nervosa.	2	2	0.0227247	ESR1, SLC6A4	100	3	12971	86.4733	1	0.185374	0.172608
GAD_DISEASE	colon cancer; rectal cancer	2	2	0.0227247	AR, ESR1	100	3	12971	86.4733	1	0.185374	0.172608
GAD_DISEASE	body mass; obesity, localized	2	2	0.0227247	ADRB1, ADRB2	100	3	12971	86.4733	1	0.185374	0.172608
GAD_DISEASE	Alopecia	2	2	0.0227247	AR, CYP19A1	100	3	12971	86.4733	1	0.185374	0.172608
GAD_DISEASE	startle reflex	2	2	0.0227247	SLC6A3, SLC6A4	100	3	12971	86.4733	1	0.185374	0.172608
GAD_DISEASE	Leukemia, Lymphocytic, Chronic, B-Cell	6	6	0.0230851	CASP3, BCL2, OPRK1, AKT1, ATM, TNF	100	212	12971	3.67104	1	0.187859	0.174923
GAD_DISEASE	Hodgkin Disease	3	3	0.0232249	ATM, CYP3A4, TNF	100	31	12971	12.5526	1	0.188541	0.175557
GAD_DISEASE	Osteoarthritis, Knee	3	3	0.0246517	PPARG, ESR1, TNF	100	32	12971	12.1603	1	0.199165	0.18545
GAD_DISEASE	Intracranial Aneurysm	3	3	0.0246517	ALDH2, NOS3, TNF	100	32	12971	12.1603	1	0.199165	0.18545
GAD_DISEASE	retinopathy, diabetic	3	3	0.0261136	AR, NOS3, TNF	100	33	12971	11.7918	1	0.208476	0.194119
GAD_DISEASE	Chlamydia Infections|Inflammation|Trachoma	3	3	0.0261136	NOS3, ADRB2, TNF	100	33	12971	11.7918	1	0.208476	0.194119
GAD_DISEASE	Inflammation|Venous Thromboembolism	3	3	0.0261136	NOS3, ADRB2, TNF	100	33	12971	11.7918	1	0.208476	0.194119
GAD_DISEASE	Carcinoma, Hepatocellular|LCC - Liver cell carcinoma|Liver neoplasms	3	3	0.0261136	AR, ALDH2, TNF	100	33	12971	11.7918	1	0.208476	0.194119
GAD_DISEASE	Brain Ischemia|Inflammation|Stroke	3	3	0.0261136	NOS3, ADRB2, TNF	100	33	12971	11.7918	1	0.208476	0.194119
GAD_DISEASE	Leukemia, Lymphoid	3	3	0.0276098	CYP3A4, NR3C1, TNF	100	34	12971	11.445	1	0.218351	0.203315
GAD_DISEASE	heart disease	3	3	0.0276098	NOS3, PPARG, F2	100	34	12971	11.445	1	0.218351	0.203315
GAD_DISEASE	schizophrenia | autism	3	3	0.0276098	GABRA2, GABRA5, CHRNA7	100	34	12971	11.445	1	0.218351	0.203315
GAD_DISEASE	kidney transplant complications	3	3	0.0276098	NOS3, CYP3A4, TNF	100	34	12971	11.445	1	0.218351	0.203315
GAD_DISEASE	Pulmonary Disease, Chronic Obstructive	4	4	0.0288235	CAT, ADRB2, NR3C1, TNF	100	87	12971	5.96368	1	0.223014	0.207657
GAD_DISEASE	abdominal aortic aneurysm	3	3	0.0291399	NOS3, PGR, ESR1	100	35	12971	11.118	1	0.223014	0.207657
GAD_DISEASE	urinary estrogen metabolites	2	2	0.0301853	CYP19A1, CYP17A1	100	4	12971	64.855	1	0.223014	0.207657
GAD_DISEASE	atherosclerosis, coronary cardiovascular disease diabetes, type 2 hypercholesterolemia hypertension hypertriglyceridemia obesity stroke	2	2	0.0301853	NOS3, ADRB2	100	4	12971	64.855	1	0.223014	0.207657
GAD_DISEASE	Puerperal Disorders	2	2	0.0301853	TNF, SLC6A4	100	4	12971	64.855	1	0.223014	0.207657
GAD_DISEASE	diabetes, type 2; glucose tolerance	2	2	0.0301853	PTPN1, NOS3	100	4	12971	64.855	1	0.223014	0.207657
GAD_DISEASE	leukemia | bone mineral density	2	2	0.0301853	NR3C1, ESR1	100	4	12971	64.855	1	0.223014	0.207657
GAD_DISEASE	aggressive behavior	2	2	0.0301853	MAOA, SLC6A4	100	4	12971	64.855	1	0.223014	0.207657
GAD_DISEASE	estradiol; sex hormone binding globulin	2	2	0.0301853	ESR1, CYP19A1	100	4	12971	64.855	1	0.223014	0.207657
GAD_DISEASE	Brain Ischemia|Intracranial Hemorrhages|Stroke	2	2	0.0301853	PDE4D, F2	100	4	12971	64.855	1	0.223014	0.207657
GAD_DISEASE	eating disorder	2	2	0.0301853	SLC6A3, SLC6A4	100	4	12971	64.855	1	0.223014	0.207657
GAD_DISEASE	Hyperlipidemias|Pancreatitis	2	2	0.0301853	PRSS1, TNF	100	4	12971	64.855	1	0.223014	0.207657
GAD_DISEASE	decision making	2	2	0.0301853	MAOA, SLC6A4	100	4	12971	64.855	1	0.223014	0.207657
GAD_DISEASE	gastrointestinal disorders	2	2	0.0301853	ADRA2A, SLC6A4	100	4	12971	64.855	1	0.223014	0.207657
GAD_DISEASE	glucose intolerance	2	2	0.0301853	CAT, PPARG	100	4	12971	64.855	1	0.223014	0.207657
GAD_DISEASE	alcohol withdrawal alcoholism	2	2	0.0301853	GABRA1, GABRA6	100	4	12971	64.855	1	0.223014	0.207657
GAD_DISEASE	heroin addiction	2	2	0.0301853	MAOA, OPRK1	100	4	12971	64.855	1	0.223014	0.207657
GAD_DISEASE	alcohol abuse smoking behavior	2	2	0.0301853	SLC6A3, SLC6A4	100	4	12971	64.855	1	0.223014	0.207657
GAD_DISEASE	Heart Failure|Myocardial ischemia	2	2	0.0301853	ADRB1, ADRB2	100	4	12971	64.855	1	0.223014	0.207657
GAD_DISEASE	Heart Failure|Myocardial Infarction	2	2	0.0301853	ADRB1, ADRB2	100	4	12971	64.855	1	0.223014	0.207657
GAD_DISEASE	posttraumatic stress disorder	2	2	0.0301853	SLC6A3, SLC6A4	100	4	12971	64.855	1	0.223014	0.207657
GAD_DISEASE	radiotoxicity	2	2	0.0301853	NOS3, CAT	100	4	12971	64.855	1	0.223014	0.207657
GAD_DISEASE	Hyperlipidemias|Myocardial Infarction|Obesity	2	2	0.0301853	ADRB2, TNF	100	4	12971	64.855	1	0.223014	0.207657
GAD_DISEASE	antisocial personality disorder attention deficit hyperactivity disorder	2	2	0.0301853	SLC6A3, SLC6A4	100	4	12971	64.855	1	0.223014	0.207657
GAD_DISEASE	Takotsubo Cardiomyopathy	2	2	0.0301853	ADRB1, ADRB2	100	4	12971	64.855	1	0.223014	0.207657
GAD_DISEASE	shyness	2	2	0.0301853	MAOA, SLC6A4	100	4	12971	64.855	1	0.223014	0.207657
GAD_DISEASE	Adenoma|Adrenal Cortex Neoplasms|Cushing Syndrome	2	2	0.0301853	PDE11A, PDE8B	100	4	12971	64.855	1	0.223014	0.207657
GAD_DISEASE	alcoholism attention deficit hyperactivity disorder	2	2	0.0301853	ALDH2, SLC6A4	100	4	12971	64.855	1	0.223014	0.207657
GAD_DISEASE	vascular response	2	2	0.0301853	NOS3, ADRA1A	100	4	12971	64.855	1	0.223014	0.207657
GAD_DISEASE	Major Psychoses	2	2	0.0301853	GABRA1, SLC6A4	100	4	12971	64.855	1	0.223014	0.207657
GAD_DISEASE	Behcet's disease	3	3	0.0322989	NOS3, F2, TNF	100	37	12971	10.517	1	0.238107	0.22171
GAD_DISEASE	Diabetes Mellitus	5	5	0.0327302	PDE4D, CAT, PPARG, ESR1, TNF	100	158	12971	4.10475	1	0.24076	0.22418
GAD_DISEASE	Coronary Artery Disease|Inflammation	3	3	0.0372762	NOS3, ADRB2, TNF	100	40	12971	9.72825	1	0.257922	0.24016
GAD_DISEASE	anorexia nervosa	3	3	0.0372762	ESR1, TNF, SLC6A4	100	40	12971	9.72825	1	0.257922	0.24016
GAD_DISEASE	Venous Thrombosis	3	3	0.0372762	NOS3, F2, ESR1	100	40	12971	9.72825	1	0.257922	0.24016
GAD_DISEASE	testicular germ cell tumour	2	2	0.0375897	AR, CYP17A1	100	5	12971	51.884	1	0.257922	0.24016
GAD_DISEASE	interstitial cystitis	2	2	0.0375897	ADRA1D, ADRB2	100	5	12971	51.884	1	0.257922	0.24016
GAD_DISEASE	body mass; insulin; obesity; glucose	2	2	0.0375897	PPARG, ADRB2	100	5	12971	51.884	1	0.257922	0.24016
GAD_DISEASE	leukemia/lymphoma, T-Cell	2	2	0.0375897	BCL2, TNF	100	5	12971	51.884	1	0.257922	0.24016
GAD_DISEASE	uterine leiomyoma	2	2	0.0375897	ESR1, CYP17A1	100	5	12971	51.884	1	0.257922	0.24016
GAD_DISEASE	headache	2	2	0.0375897	MAOA, SLC6A3	100	5	12971	51.884	1	0.257922	0.24016
GAD_DISEASE	Hypertension, Pregnancy-Induced	2	2	0.0375897	NOS3, ESR1	100	5	12971	51.884	1	0.257922	0.24016
GAD_DISEASE	Alzheimer's disease; dementia	2	2	0.0375897	NOS3, TNF	100	5	12971	51.884	1	0.257922	0.24016
GAD_DISEASE	Lymphoma, Non-Hodgkin|Lymphoma, Non-Hodgkin's|Translocation, Genetic	2	2	0.0375897	BCL2, TNF	100	5	12971	51.884	1	0.257922	0.24016
GAD_DISEASE	Angina Pectoris, Variant	2	2	0.0375897	AR, NOS3	100	5	12971	51.884	1	0.257922	0.24016
GAD_DISEASE	Maduromycosis|Mycetoma	2	2	0.0375897	CYP19A1, CYP17A1	100	5	12971	51.884	1	0.257922	0.24016
GAD_DISEASE	testosterone; estradiol; androstenedione; DHEA; progesterone	2	2	0.0375897	CYP19A1, CYP17A1	100	5	12971	51.884	1	0.257922	0.24016
GAD_DISEASE	dystonia, acute parkinsonism tardive dyskinesia	2	2	0.0375897	SLC6A3, SLC6A4	100	5	12971	51.884	1	0.257922	0.24016
GAD_DISEASE	Precursor T-Cell Lymphoblastic Leukemia-Lymphoma	2	2	0.0375897	PIK3CA, AKT1	100	5	12971	51.884	1	0.257922	0.24016
GAD_DISEASE	stroke; sickle cell anemia	2	2	0.0375897	ADRB2, TNF	100	5	12971	51.884	1	0.257922	0.24016
GAD_DISEASE	Alcoholism|Substance Withdrawal Syndrome	2	2	0.0375897	AR, SLC6A4	100	5	12971	51.884	1	0.257922	0.24016
GAD_DISEASE	obsessive- compulsive disorder	2	2	0.0375897	SLC6A3, SLC6A4	100	5	12971	51.884	1	0.257922	0.24016
GAD_DISEASE	inflammatory markers	2	2	0.0375897	NOS3, TNF	100	5	12971	51.884	1	0.257922	0.24016
GAD_DISEASE	Brain Ischemia|Intracranial Arterial Diseases|Stroke	2	2	0.0375897	NOS3, F2	100	5	12971	51.884	1	0.257922	0.24016
GAD_DISEASE	Cryptorchidism|Hypospadias	2	2	0.0375897	AR, ESR1	100	5	12971	51.884	1	0.257922	0.24016
GAD_DISEASE	acute myocardial infarction	2	2	0.0375897	F2, ESR1	100	5	12971	51.884	1	0.257922	0.24016
GAD_DISEASE	prostate volume/histology endocrine patterns	2	2	0.0375897	AR, CYP17A1	100	5	12971	51.884	1	0.257922	0.24016
GAD_DISEASE	Deliberate self-harm	2	2	0.0375897	MAOA, SLC6A4	100	5	12971	51.884	1	0.257922	0.24016
GAD_DISEASE	Fractures, Spontaneous|Osteoporosis, Postmenopausal	2	2	0.0375897	ESR1, CYP19A1	100	5	12971	51.884	1	0.257922	0.24016
GAD_DISEASE	pulmonary hypertension	2	2	0.0375897	NOS3, SLC6A4	100	5	12971	51.884	1	0.257922	0.24016
GAD_DISEASE	prostate carcinoma	2	2	0.0375897	ESR1, CYP19A1	100	5	12971	51.884	1	0.257922	0.24016
GAD_DISEASE	retinopathy, diabetic; nephropathy in other diseases	2	2	0.0375897	AR, NOS3	100	5	12971	51.884	1	0.257922	0.24016
GAD_DISEASE	lithium	2	2	0.0375897	SLC6A3, SLC6A4	100	5	12971	51.884	1	0.257922	0.24016
GAD_DISEASE	Pregnancy Complications, Hematologic|Premature Birth|Thrombophilia	2	2	0.0375897	F2, TNF	100	5	12971	51.884	1	0.257922	0.24016
GAD_DISEASE	pain response	2	2	0.0375897	MAOA, SLC6A4	100	5	12971	51.884	1	0.257922	0.24016
GAD_DISEASE	Inflammatory bowel disease, NOS|Inflammatory Bowel Diseases	3	3	0.0389968	F2, NR3C1, TNF	100	41	12971	9.49098	1	0.265952	0.247637
GAD_DISEASE	thromboembolism, venous	3	3	0.0389968	NOS3, F2, TNF	100	41	12971	9.49098	1	0.265952	0.247637
GAD_DISEASE	DNA damage	3	3	0.0389968	ALDH2, ADH1B, CAT	100	41	12971	9.49098	1	0.265952	0.247637
GAD_DISEASE	Birth Weight	3	3	0.0407471	PPARG, ADRB2, NR3C1	100	42	12971	9.265	1	0.277327	0.258229
GAD_DISEASE	periodontitis	4	4	0.0430601	ALDH2, ESR1, TNF, CTSD	100	102	12971	5.08667	1	0.288374	0.268515
GAD_DISEASE	Dengue Hemorrhagic Fever	4	4	0.0430601	AR, CYP3A4, CYP19A1, TNF	100	102	12971	5.08667	1	0.288374	0.268515
GAD_DISEASE	Colorectal Neoplasms	4	4	0.0441139	AR, NT5E, PIK3CA, ATM	100	103	12971	5.03728	1	0.288374	0.268515
GAD_DISEASE	Abruptio Placentae|Thrombophilia	2	2	0.044938	NOS3, F2	100	6	12971	43.2367	1	0.288374	0.268515
GAD_DISEASE	Myocardial Infarction|Myocardial ischemia	2	2	0.044938	ESR1, TNF	100	6	12971	43.2367	1	0.288374	0.268515
GAD_DISEASE	Uterine Prolapse	2	2	0.044938	PGR, ESR1	100	6	12971	43.2367	1	0.288374	0.268515
GAD_DISEASE	Vertebral Artery Dissection	2	2	0.044938	NOS3, F2	100	6	12971	43.2367	1	0.288374	0.268515
GAD_DISEASE	BP-Major Depressive	2	2	0.044938	MAOA, SLC6A4	100	6	12971	43.2367	1	0.288374	0.268515
GAD_DISEASE	cholesterol, HDL; lipoprotein	2	2	0.044938	ADH1C, ADH1B	100	6	12971	43.2367	1	0.288374	0.268515
GAD_DISEASE	Death, Sudden, Cardiac|Sudden Cardiac Death	2	2	0.044938	ADRB2, SCN5A	100	6	12971	43.2367	1	0.288374	0.268515
GAD_DISEASE	Altitude Sickness	2	2	0.044938	NOS3, ADRB2	100	6	12971	43.2367	1	0.288374	0.268515
GAD_DISEASE	Atrial Fibrillation|Hypertension	2	2	0.044938	ADRB1, ADRB2	100	6	12971	43.2367	1	0.288374	0.268515
GAD_DISEASE	HIV-Associated Lipodystrophy Syndrome	2	2	0.044938	PPARG, ADRB2	100	6	12971	43.2367	1	0.288374	0.268515
GAD_DISEASE	bone density; fractures	2	2	0.044938	ESR1, CYP19A1	100	6	12971	43.2367	1	0.288374	0.268515
GAD_DISEASE	Hypertension induced by pregnancy|Hypertension, Pregnancy-Induced	2	2	0.044938	NOS3, PPARG	100	6	12971	43.2367	1	0.288374	0.268515
GAD_DISEASE	varicose ulcers	2	2	0.044938	F2, ESR1	100	6	12971	43.2367	1	0.288374	0.268515
GAD_DISEASE	atherosclerosis, coronary hyperlipidemia	2	2	0.044938	RXRA, PPARG	100	6	12971	43.2367	1	0.288374	0.268515
GAD_DISEASE	mammographic density	2	2	0.044938	ESR1, CYP19A1	100	6	12971	43.2367	1	0.288374	0.268515
GAD_DISEASE	age at natural menopause	2	2	0.044938	ESR1, CYP19A1	100	6	12971	43.2367	1	0.288374	0.268515
GAD_DISEASE	cholesterol cholesterol, HDL cholesterol, LDL fatty acid glucose insulin lipoprotein triacylglycerols	2	2	0.044938	NOS3, ESR1	100	6	12971	43.2367	1	0.288374	0.268515
GAD_DISEASE	suicidal behavior	2	2	0.044938	ESR1, SLC6A4	100	6	12971	43.2367	1	0.288374	0.268515
GAD_DISEASE	Biliary calculi|Biliary Tract Neoplasm|Biliary Tract Neoplasms|Gallstones	2	2	0.044938	AR, ESR1	100	6	12971	43.2367	1	0.288374	0.268515
GAD_DISEASE	oral lichen planus	2	2	0.044938	TNF, SLC6A4	100	6	12971	43.2367	1	0.288374	0.268515
GAD_DISEASE	self-harm behavior	2	2	0.044938	MAOA, SLC6A4	100	6	12971	43.2367	1	0.288374	0.268515
GAD_DISEASE	Angina, Unstable|Coronary Stenosis|Inflammation|Myocardial Infarction	2	2	0.044938	PDE4D, TNF	100	6	12971	43.2367	1	0.288374	0.268515
GAD_DISEASE	Heart Diseases|Hypercholesterolemia|Hypertension	2	2	0.044938	NOS3, F2	100	6	12971	43.2367	1	0.288374	0.268515
GAD_DISEASE	Amphetamine-Related Disorders|Psychoses, Substance-Induced	2	2	0.044938	ADORA2A, SLC6A4	100	6	12971	43.2367	1	0.288374	0.268515
GAD_DISEASE	breast cancer fibroadenoma	2	2	0.044938	CYP19A1, CYP17A1	100	6	12971	43.2367	1	0.288374	0.268515
GAD_DISEASE	Fractures, Bone|Osteoporosis, Postmenopausal	2	2	0.044938	ESR1, TNF	100	6	12971	43.2367	1	0.288374	0.268515
GAD_DISEASE	Ovarian Failure, Premature|POF - Premature ovarian failure	2	2	0.044938	AR, ESR1	100	6	12971	43.2367	1	0.288374	0.268515
GAD_DISEASE	Arthritis, Rheumatoid|Rheumatoid Arthritis	5	5	0.0456808	AR, PPARG, ADRB2, NR3C1, TNF	100	176	12971	3.68494	1	0.292583	0.272434
GAD_DISEASE	Crohn's disease ulcerative colitis	3	3	0.0461713	NOS3, F2, TNF	100	45	12971	8.64733	1	0.295163	0.274838
GAD_DISEASE	Diabetes Mellitus, Type 2	5	5	0.0472734	ACHE, ALDH2, ADH1B, PPARG, TNF	100	178	12971	3.64354	1	0.301636	0.280865
GAD_DISEASE	liver cancer	3	3	0.0518444	ADH1C, TNF, CYP17A1	100	48	12971	8.10688	1	0.321105	0.298993
GAD_DISEASE	rectal cancer	2	2	0.0522308	PIK3CA, ATM	100	7	12971	37.06	1	0.321105	0.298993
GAD_DISEASE	Pulmonary Embolism|Pulmonary Embolisms|Venous Thrombosis	2	2	0.0522308	ADRB2, F2	100	7	12971	37.06	1	0.321105	0.298993
GAD_DISEASE	Obstetric Labor, Premature	2	2	0.0522308	ADRB2, TNF	100	7	12971	37.06	1	0.321105	0.298993
GAD_DISEASE	Fabry Disease	2	2	0.0522308	NOS3, TNF	100	7	12971	37.06	1	0.321105	0.298993
GAD_DISEASE	Hypertension|Insulin Resistance	2	2	0.0522308	PPARG, TNF	100	7	12971	37.06	1	0.321105	0.298993
GAD_DISEASE	Carcinoma, Hepatocellular|Hepatitis B|Hepatitis C|LCC - Liver cell carcinoma|Liver neoplasms	2	2	0.0522308	AR, TNF	100	7	12971	37.06	1	0.321105	0.298993
GAD_DISEASE	Carcinoma, Squamous Cell|Esophageal Neoplasms|Neoplasm Metastasis|Oesophageal neoplasm|Squamous cell carcinoma	2	2	0.0522308	ALDH2, ADH1B	100	7	12971	37.06	1	0.321105	0.298993
GAD_DISEASE	anxiety	2	2	0.0522308	SLC6A3, SLC6A4	100	7	12971	37.06	1	0.321105	0.298993
GAD_DISEASE	memory impairment	2	2	0.0522308	AR, NOS3	100	7	12971	37.06	1	0.321105	0.298993
GAD_DISEASE	Asthma. total IgE. SPT	2	2	0.0522308	ADRB2, TNF	100	7	12971	37.06	1	0.321105	0.298993
GAD_DISEASE	puberty onset	2	2	0.0522308	CYP3A4, CYP17A1	100	7	12971	37.06	1	0.321105	0.298993
GAD_DISEASE	Obesity|Overweight|Weight Loss	2	2	0.0522308	ADRA2A, SLC6A4	100	7	12971	37.06	1	0.321105	0.298993
GAD_DISEASE	Muscular Diseases	2	2	0.0522308	CYP3A4, TNF	100	7	12971	37.06	1	0.321105	0.298993
GAD_DISEASE	Atherosclerosis|Cardiovascular Diseases	2	2	0.0522308	PPARG, TNF	100	7	12971	37.06	1	0.321105	0.298993
GAD_DISEASE	memory performance	2	2	0.0522308	AR, CHRNA7	100	7	12971	37.06	1	0.321105	0.298993
GAD_DISEASE	Cryptorchidism	2	2	0.0522308	AR, ESR1	100	7	12971	37.06	1	0.321105	0.298993
GAD_DISEASE	Carcinoma, Papillary, Follicular|Neoplasm Metastasis|Thyroid Neoplasms	2	2	0.0522308	PIK3CA, AKT1	100	7	12971	37.06	1	0.321105	0.298993
GAD_DISEASE	Carcinoma|Carcinoma, Papillary|Necrosis|Neoplasm Recurrence, Local|thyroid neoplasm|Thyroid Neoplasms	2	2	0.0522308	PIK3CA, AKT1	100	7	12971	37.06	1	0.321105	0.298993
GAD_DISEASE	Laryngeal neoplasm|Laryngeal Neoplasms	2	2	0.0522308	ADH1C, ADH1B	100	7	12971	37.06	1	0.321105	0.298993
GAD_DISEASE	Carcinoma, Squamous Cell|Esophageal Neoplasms	3	3	0.0537883	ALDH2, ADH1B, BCL2	100	49	12971	7.94143	1	0.330078	0.307347
GAD_DISEASE	Hepatitis C|Remission, Spontaneous	4	4	0.0541703	PIK3CA, PIK3CB, TNF, PIK3CG	100	112	12971	4.6325	1	0.331818	0.308968
GAD_DISEASE	Stroke	9	9	0.0549956	CHRM1, ADH1C, NOS3, PDE4D, PDE4B, F2, ESR1, TNF, PTGS1	100	542	12971	2.15386	1	0.336262	0.313106
GAD_DISEASE	obsessive-compulsive disorder	2	2	0.0594685	MAOA, SLC6A4	100	8	12971	32.4275	1	0.35586	0.331354
GAD_DISEASE	bipolar disorder; depression	2	2	0.0594685	MAOA, SLC6A4	100	8	12971	32.4275	1	0.35586	0.331354
GAD_DISEASE	Hodgkin's disease	2	2	0.0594685	BCL2, ATM	100	8	12971	32.4275	1	0.35586	0.331354
GAD_DISEASE	cardiovascular disease risk	2	2	0.0594685	NOS3, ESR1	100	8	12971	32.4275	1	0.35586	0.331354
GAD_DISEASE	Hypersensitivity, Immediate	2	2	0.0594685	ADH1C, ADH1B	100	8	12971	32.4275	1	0.35586	0.331354
GAD_DISEASE	ischemic stroke	2	2	0.0594685	PDE4D, F2	100	8	12971	32.4275	1	0.35586	0.331354
GAD_DISEASE	Delayed Graft Function	2	2	0.0594685	CAT, TNF	100	8	12971	32.4275	1	0.35586	0.331354
GAD_DISEASE	limb deficiency anomalies	2	2	0.0594685	ADRB2, TNF	100	8	12971	32.4275	1	0.35586	0.331354
GAD_DISEASE	cocaine abuse	2	2	0.0594685	SLC6A3, SLC6A4	100	8	12971	32.4275	1	0.35586	0.331354
GAD_DISEASE	Infection|Precursor Cell Lymphoblastic Leukemia-Lymphoma	2	2	0.0594685	NR3C1, TNF	100	8	12971	32.4275	1	0.35586	0.331354
GAD_DISEASE	Asthma|Respiratory Sounds	2	2	0.0594685	ADRB2, TNF	100	8	12971	32.4275	1	0.35586	0.331354
GAD_DISEASE	Hallucinations	2	2	0.0594685	MAOB, SLC6A4	100	8	12971	32.4275	1	0.35586	0.331354
GAD_DISEASE	Coronary Artery Disease|	3	3	0.0597716	F2, ESR1, TNF	100	52	12971	7.48327	1	0.35704	0.332453
GAD_DISEASE	leukemia	4	4	0.0614329	CAT, BCL2, ATM, CYP3A4	100	118	12971	4.39695	1	0.366314	0.341088
GAD_DISEASE	Blood Pressure	8	8	0.0630696	GABRA6, NOS3, PDE4B, ITPR2, NR3C1, SLC6A3, ADRA2A, CYP17A1	100	462	12971	2.24606	1	0.375409	0.349557
GAD_DISEASE	substance abuse	2	2	0.0666514	GABRA2, SLC6A4	100	9	12971	28.8244	1	0.386486	0.359872
GAD_DISEASE	Gastritis, Atrophic|Helicobacter Infections|Metaplasia|Peptic Ulcer	2	2	0.0666514	ALDH2, TNF	100	9	12971	28.8244	1	0.386486	0.359872
GAD_DISEASE	Cadaver|Infarction|Postoperative Complications|Thrombosis|Vascular Diseases	2	2	0.0666514	F2, TNF	100	9	12971	28.8244	1	0.386486	0.359872
GAD_DISEASE	Hypertension|Hypertrophy, Left Ventricular|Left Ventricular Hypertrophy	2	2	0.0666514	ADRB1, ADRB2	100	9	12971	28.8244	1	0.386486	0.359872
GAD_DISEASE	Retinal Neoplasms|Retinoblastoma	2	2	0.0666514	PIK3CA, AKT1	100	9	12971	28.8244	1	0.386486	0.359872
GAD_DISEASE	Insulin Resistance|POLYCYSTIC OVARIAN SYNDROME|Polycystic Ovary Syndrome	2	2	0.0666514	AR, PPARG	100	9	12971	28.8244	1	0.386486	0.359872
GAD_DISEASE	Hip Fractures	2	2	0.0666514	ESR1, CYP19A1	100	9	12971	28.8244	1	0.386486	0.359872
GAD_DISEASE	peripheral vascular disease	2	2	0.0666514	NOS3, F2	100	9	12971	28.8244	1	0.386486	0.359872
GAD_DISEASE	cognitive impairment	2	2	0.0666514	NOS3, ESR1	100	9	12971	28.8244	1	0.386486	0.359872
GAD_DISEASE	response to antidepressants	2	2	0.0666514	NR3C1, ADRA2A	100	9	12971	28.8244	1	0.386486	0.359872
GAD_DISEASE	Coronary Restenosis|Coronary Stenosis	2	2	0.0666514	RXRA, PPARG	100	9	12971	28.8244	1	0.386486	0.359872
GAD_DISEASE	preterm birth	2	2	0.0666514	PGR, TNF	100	9	12971	28.8244	1	0.386486	0.359872
GAD_DISEASE	urolithiasis	2	2	0.0666514	AR, ESR1	100	9	12971	28.8244	1	0.386486	0.359872
GAD_DISEASE	sickle cell anemia	2	2	0.0666514	NOS3, F2	100	9	12971	28.8244	1	0.386486	0.359872
GAD_DISEASE	diabetic neuropathy	2	2	0.0666514	NOS3, CAT	100	9	12971	28.8244	1	0.386486	0.359872
GAD_DISEASE	Arthritis, Juvenile Rheumatoid|	2	2	0.0737801	ADRB2, TNF	100	10	12971	25.942	1	0.421297	0.392285
GAD_DISEASE	male infertility	2	2	0.0737801	PDE3A, ESR1	100	10	12971	25.942	1	0.421297	0.392285
GAD_DISEASE	Wounds and Injuries	2	2	0.0737801	TNF, SLC6A4	100	10	12971	25.942	1	0.421297	0.392285
GAD_DISEASE	Duodenal Ulcer	2	2	0.0737801	NOS3, TNF	100	10	12971	25.942	1	0.421297	0.392285
GAD_DISEASE	Human Longevity	2	2	0.0737801	PIK3CB, TNF	100	10	12971	25.942	1	0.421297	0.392285
GAD_DISEASE	Hypertrophy, Left Ventricular|Left Ventricular Hypertrophy	2	2	0.0737801	ADRB1, ESR1	100	10	12971	25.942	1	0.421297	0.392285
GAD_DISEASE	Communicable Diseases|Severe Acute Respiratory Syndrome	2	2	0.0737801	NOS3, TNF	100	10	12971	25.942	1	0.421297	0.392285
GAD_DISEASE	Alzheimer's disease; Parkinson's disease	2	2	0.0737801	MAOB, MAOA	100	10	12971	25.942	1	0.421297	0.392285
GAD_DISEASE	Glaucoma, Open-Angle|Low Tension Glaucoma|Ocular Hypertension	2	2	0.0737801	NOS3, TNF	100	10	12971	25.942	1	0.421297	0.392285
GAD_DISEASE	Heart Failure	7	7	0.0740729	RXRA, NOS3, ITPR1, ADRB1, ADRB2, ADRA2C, TNF	100	385	12971	2.35836	1	0.422253	0.393175
GAD_DISEASE	Diabetes Complications|	2	2	0.0808548	NOS3, PPARG	100	11	12971	23.5836	1	0.452491	0.421331
GAD_DISEASE	affective disorder	2	2	0.0808548	GABRA3, SLC6A4	100	11	12971	23.5836	1	0.452491	0.421331
GAD_DISEASE	EKG, abnormal	2	2	0.0808548	KCND2, SCN5A	100	11	12971	23.5836	1	0.452491	0.421331
GAD_DISEASE	Diabetic Retinopathy	2	2	0.0808548	NOS3, TNF	100	11	12971	23.5836	1	0.452491	0.421331
GAD_DISEASE	Essential Hypertension	2	2	0.0808548	NOS3, PPARG	100	11	12971	23.5836	1	0.452491	0.421331
GAD_DISEASE	Familial Mediterranean Fever	2	2	0.0808548	F2, TNF	100	11	12971	23.5836	1	0.452491	0.421331
GAD_DISEASE	schizophrenia weight gain	2	2	0.0808548	ADRA1A, SLC6A4	100	11	12971	23.5836	1	0.452491	0.421331
GAD_DISEASE	aspirin resistance	2	2	0.0808548	F2, PTGS1	100	11	12971	23.5836	1	0.452491	0.421331
GAD_DISEASE	liver disease, alcoholic	2	2	0.0808548	ALDH2, TNF	100	11	12971	23.5836	1	0.452491	0.421331
GAD_DISEASE	Psychophysiologic Disorders	2	2	0.0808548	NR3C1, SLC6A4	100	11	12971	23.5836	1	0.452491	0.421331
GAD_DISEASE	Knee osteoarthritis	2	2	0.0808548	ESR1, TNF	100	11	12971	23.5836	1	0.452491	0.421331
GAD_DISEASE	citalopram	2	2	0.0878761	MAOA, CYP3A4	100	12	12971	21.6183	1	0.48296	0.449702
GAD_DISEASE	AHG deficiency disease|Hemophilia A	2	2	0.0878761	F2, TNF	100	12	12971	21.6183	1	0.48296	0.449702
GAD_DISEASE	Metabolic Syndrome X|Obesity	2	2	0.0878761	PPARG, NR3C1	100	12	12971	21.6183	1	0.48296	0.449702
GAD_DISEASE	Adenocarcinoma|Neoplasms, Prostatic|Prostatic Neoplasms	2	2	0.0878761	AR, CASP3	100	12	12971	21.6183	1	0.48296	0.449702
GAD_DISEASE	liver disease	2	2	0.0878761	ALDH2, CYP17A1	100	12	12971	21.6183	1	0.48296	0.449702
GAD_DISEASE	Brain Infarction	2	2	0.0878761	NOS3, PDE4D	100	12	12971	21.6183	1	0.48296	0.449702
GAD_DISEASE	mamographic density	2	2	0.0878761	CYP19A1, CYP17A1	100	12	12971	21.6183	1	0.48296	0.449702
GAD_DISEASE	Urticaria	2	2	0.0878761	ADRB2, TNF	100	12	12971	21.6183	1	0.48296	0.449702
GAD_DISEASE	alpha 1-Antitrypsin Deficiency|Lung Neoplasms|Neoplasm of lung |Pulmonary Disease, Chronic Obstructive	2	2	0.0878761	NOS3, TNF	100	12	12971	21.6183	1	0.48296	0.449702
GAD_DISEASE	Diabetes mellitus type II|Diabetes Mellitus, Type 2|Diabetic Retinopathy	2	2	0.0878761	NOS3, TNF	100	12	12971	21.6183	1	0.48296	0.449702
GAD_DISEASE	Helicobacter Infections|Inflammation|Precancerous Conditions|Stomach Neoplasms	2	2	0.0878761	TNF, PTGS1	100	12	12971	21.6183	1	0.48296	0.449702
GAD_DISEASE	Osteoarthritis	3	3	0.0903653	AR, ESR1, TNF	100	66	12971	5.89591	1	0.495832	0.461687
GAD_DISEASE	Body Weight	7	7	0.0934181	RXRA, PPARG, ADRB2, CYP3A4, ADRA1A, SLC6A4, PTGS1	100	410	12971	2.21456	1	0.510432	0.475282
GAD_DISEASE	Dyslipidemias|HIV Infections|[X]Human immunodeficiency virus disease	2	2	0.0948442	ADRB2, TNF	100	13	12971	19.9554	1	0.510432	0.475282
GAD_DISEASE	Dyslipidemias	2	2	0.0948442	PPARG, CYP3A4	100	13	12971	19.9554	1	0.510432	0.475282
GAD_DISEASE	Pancreatitis, Alcoholic|Pancreatitis, Chronic	2	2	0.0948442	PRSS1, ALDH2	100	13	12971	19.9554	1	0.510432	0.475282
GAD_DISEASE	Dyskinesia, Drug-Induced|	2	2	0.0948442	GABRA3, ABAT	100	13	12971	19.9554	1	0.510432	0.475282
GAD_DISEASE	Fatigue|Fatigue Syndrome, Chronic	2	2	0.0948442	MAOA, SLC6A4	100	13	12971	19.9554	1	0.510432	0.475282
GAD_DISEASE	Brain Injuries	2	2	0.0948442	BCL2, SLC6A4	100	13	12971	19.9554	1	0.510432	0.475282
GAD_DISEASE	pharmacogenetic variation	2	2	0.0948442	CYP3A4, TNF	100	13	12971	19.9554	1	0.510432	0.475282
GAD_DISEASE	gastric disease	2	2	0.0948442	ALDH2, TNF	100	13	12971	19.9554	1	0.510432	0.475282
GAD_DISEASE	beta-thalassemia	2	2	0.0948442	F2, TNF	100	13	12971	19.9554	1	0.510432	0.475282
GAD_DISEASE	Esophageal Neoplasms|Hyperglycemia|Oesophageal neoplasm	2	2	0.0948442	PPARG, TNF	100	13	12971	19.9554	1	0.510432	0.475282
GAD_DISEASE	Adenocarcinoma, Papillary|thyroid neoplasm|Thyroid Neoplasms	2	2	0.0948442	PIK3CA, AKT1	100	13	12971	19.9554	1	0.510432	0.475282
GAD_DISEASE	lupus erythematosus	3	3	0.0998036	NOS3, NR3C1, TNF	100	70	12971	5.559	1	0.536265	0.499336
